# Supplementary material for: Physical Inactivity and Non-Communicable Disease Burden in Low-, Middle-, and High-Income Countries
Source: PubMed Central journal article supplement (PMC8478970; doi:10.1136/bjsports-2020-103640), 2021-03-29
Supplement: NIHMS1697438-supplement-Supp1.pdf [file NIHMS1697438-supplement-Supp1.pdf]

## Supplementary Appendix

### Physical Inactivity and Non-Communicable Disease Burden in Low-, Middle-, and High-Income Countries

Peter T. Katzmarzyk, PhD<sup>1</sup>, Christine Friedenreich, PhD<sup>2</sup>, Eric Shiroma, ScD<sup>3</sup> and I-Min Lee, ScD<sup>4</sup>

<sup>1</sup>Pennington Biomedical Research Center, 6400 Perkins Road, Baton Rouge, LA, 70810

<sup>2</sup>Cumming School of Medicine and Faculty of Kinesiology, University of Calgary, and Department of Cancer Epidemiology and Prevention Research, Cancer Care Alberta, Alberta Health Services, Room 514, Holy Cross Centre, 2210 2nd St SW, Calgary, AB, T2S 3C3

<sup>3</sup>Laboratory of Epidemiology and Population Science, National Institute on Aging, 7201 Wisconsin Ave, Gateway Bldg, Suite 2N300, Bethesda, MD 20814

<sup>4</sup>Department of Epidemiology, Harvard T.H. Chan School of Public Health, and Division of Preventive Medicine, Brigham and Women's Hospital, 900 Commonwealth Avenue East, Boston, MA, 02215

#### **Address for Correspondence:**

Peter T. Katzmarzyk, PhD, Pennington Biomedical Research Center, 6400 Perkins Road, Baton Rouge, LA. 70808-4124; Phone (225) 763-2536; Fax: (225) 763-2927;  
Email: [Peter.Katzmarzyk@pbrc.edu](mailto:Peter.Katzmarzyk@pbrc.edu)

**Supplementary Table 1. Population Attributable Risks for Physical Inactivity and All-Cause Mortality, Cardiovascular Disease Mortality, Coronary Heart Disease, Stroke, and Hypertension by Country**

| <b>Country</b>           | <b>All-Cause Mortality</b> | <b>Cardiovascular Disease Mortality</b> | <b>Coronary Heart Disease</b> | <b>Stroke</b>     | <b>Hypertension</b> |
|--------------------------|----------------------------|-----------------------------------------|-------------------------------|-------------------|---------------------|
| Algeria                  | 8.6 (6.1 to 11.4)          | 9.2 (6.8 to 11.8)                       | 6.0 (4.0 to 8.3)              | 6.0 (3.4 to 9.0)  | 2.0 (1.1 to 3.0)    |
| American Samoa           | 13.0 (9.4 to 17.1)         | 13.8 (10.4 to 17.5)                     | 9.2 (6.2 to 12.6)             | 9.2 (5.3 to 13.9) | 3.1 (1.7 to 4.6)    |
| Andorra                  | 9.7 (7.1 to 12.6)          | 10.3 (8.0 to 13.0)                      | 6.8 (4.7 to 9.2)              | 6.8 (3.9 to 10.1) | 2.3 (1.3 to 3.3)    |
| Argentina                | 10.4 (7.6 to 13.5)         | 11.1 (8.5 to 13.8)                      | 7.3 (5.0 to 9.9)              | 7.3 (4.2 to 10.9) | 2.4 (1.4 to 3.6)    |
| Armenia                  | 6.0 (4.0 to 8.1)           | 6.4 (4.5 to 8.5)                        | 4.1 (2.6 to 5.8)              | 4.1 (2.2 to 6.3)  | 1.3 (0.7 to 2.1)    |
| Australia                | 7.8 (5.7 to 10.4)          | 8.4 (6.3 to 10.6)                       | 5.5 (3.7 to 7.5)              | 5.5 (3.1 to 8.1)  | 1.8 (1.0 to 2.7)    |
| Austria                  | 7.8 (5.7 to 10.1)          | 8.3 (6.4 to 10.5)                       | 5.4 (3.7 to 7.3)              | 5.4 (3.1 to 8.0)  | 1.8 (1.0 to 2.6)    |
| Bahamas                  | 10.8 (8.0 to 14.0)         | 11.5 (8.9 to 14.4)                      | 7.6 (5.2 to 10.3)             | 7.6 (4.4 to 11.3) | 2.5 (1.4 to 3.7)    |
| Bangladesh               | 7.2 (4.4 to 10.4)          | 7.7 (4.9 to 10.8)                       | 5.0 (2.9 to 7.5)              | 5.0 (2.6 to 8.1)  | 1.6 (0.8 to 2.6)    |
| Barbados                 | 10.7 (7.9 to 13.9)         | 11.4 (8.7 to 14.4)                      | 7.5 (5.2 to 10.3)             | 7.5 (4.3 to 11.2) | 2.5 (1.4 to 3.7)    |
| Belarus                  | 3.8 (2.5 to 5.3)           | 4.1 (2.7 to 5.5)                        | 2.6 (1.7 to 3.8)              | 2.6 (1.4 to 4.0)  | 0.8 (0.5 to 1.3)    |
| Belgium                  | 9.1 (6.7 to 11.8)          | 9.7 (7.6 to 12.0)                       | 6.4 (4.4 to 8.5)              | 6.4 (3.6 to 9.4)  | 2.1 (1.2 to 3.1)    |
| Benin                    | 4.3 (3.0 to 5.7)           | 4.6 (3.3 to 5.9)                        | 2.9 (1.9 to 4.1)              | 2.9 (1.6 to 4.5)  | 0.9 (0.5 to 1.4)    |
| Bermuda                  | 6.8 (4.7 to 9.3)           | 7.3 (5.2 to 9.6)                        | 4.7 (3.1 to 6.7)              | 4.7 (2.6 to 7.2)  | 1.6 (0.8 to 2.3)    |
| Bhutan                   | 6.1 (4.4 to 7.8)           | 6.5 (5.0 to 8.0)                        | 4.2 (2.9 to 5.6)              | 4.2 (2.4 to 6.2)  | 1.4 (0.8 to 2.0)    |
| Bosnia & Herzegovina     | 6.7 (4.6 to 9.1)           | 7.1 (5.1 to 9.4)                        | 4.6 (3.0 to 6.5)              | 4.6 (2.5 to 7.2)  | 1.5 (0.8 to 2.3)    |
| Botswana                 | 5.7 (4.1 to 7.6)           | 6.1 (4.6 to 7.9)                        | 4.0 (2.7 to 5.4)              | 4.0 (2.2 to 5.9)  | 1.3 (0.7 to 1.9)    |
| Brazil                   | 11.6 (8.7 to 14.9)         | 12.4 (9.7 to 15.2)                      | 8.2 (5.8 to 11.0)             | 8.2 (4.8 to 12.1) | 2.7 (1.6 to 4.1)    |
| British Virgin Islands   | 7.1 (5.0 to 9.5)           | 7.6 (5.6 to 9.7)                        | 5.0 (3.3 to 6.9)              | 5.0 (2.8 to 7.5)  | 1.6 (0.9 to 2.4)    |
| Brunei Darussalam        | 7.1 (4.6 to 9.9)           | 7.6 (5.1 to 10.4)                       | 4.9 (3.0 to 7.2)              | 4.9 (2.6 to 7.8)  | 1.6 (0.8 to 2.5)    |
| Bulgaria                 | 9.8 (7.1 to 12.7)          | 10.4 (7.9 to 13.1)                      | 6.8 (4.7 to 9.3)              | 6.8 (3.9 to 10.2) | 2.3 (1.2 to 3.4)    |
| Burkina Faso             | 5.4 (3.8 to 7.2)           | 5.7 (4.2 to 7.4)                        | 3.7 (2.5 to 5.2)              | 3.7 (2.1 to 5.7)  | 1.2 (0.7 to 1.8)    |
| Cabo Verde               | 5.2 (3.7 to 7.0)           | 5.6 (4.1 to 7.2)                        | 3.6 (2.4 to 5.0)              | 3.6 (2.0 to 5.4)  | 1.2 (0.7 to 1.8)    |
| Cambodia                 | 2.9 (1.8 to 4.1)           | 3.1 (1.9 to 4.3)                        | 2.0 (1.1 to 2.9)              | 2.0 (1.0 to 3.2)  | 0.6 (0.3 to 1.0)    |
| Cameroon                 | 7.4 (5.4 to 9.6)           | 7.9 (6.0 to 10.0)                       | 5.1 (3.5 to 7.0)              | 5.1 (2.9 to 7.7)  | 1.7 (1.0 to 2.5)    |
| Canada                   | 7.4 (5.3 to 9.9)           | 7.9 (5.9 to 10.2)                       | 5.2 (3.4 to 7.1)              | 5.2 (3.0 to 7.8)  | 1.7 (0.9 to 2.5)    |
| Cayman Islands           | 7.5 (5.3 to 10.1)          | 8.0 (5.9 to 10.4)                       | 5.2 (3.5 to 7.3)              | 5.2 (2.9 to 8.0)  | 1.7 (1.0 to 2.6)    |
| Central African Republic | 3.9 (2.7 to 5.2)           | 4.1 (3.0 to 5.3)                        | 2.7 (1.7 to 3.7)              | 2.7 (1.5 to 4.0)  | 0.9 (0.5 to 1.3)    |
| Chad                     | 6.1 (4.2 to 8.2)           | 6.5 (4.7 to 8.6)                        | 4.2 (2.8 to 6.0)              | 4.2 (2.3 to 6.5)  | 1.4 (0.8 to 2.1)    |
| Chile                    | 6.9 (4.9 to 9.2)           | 7.4 (5.4 to 9.6)                        | 4.8 (3.2 to 6.7)              | 4.8 (2.7 to 7.3)  | 1.6 (0.9 to 2.4)    |
| China                    | 3.8 (2.5 to 5.2)           | 4.1 (2.8 to 5.4)                        | 2.6 (1.7 to 3.7)              | 2.6 (1.4 to 4.0)  | 0.8 (0.5 to 1.3)    |
| Colombia                 | 11.0 (8.1 to 14.2)         | 11.7 (9.0 to 14.5)                      | 7.7 (5.3 to 10.4)             | 7.7 (4.4 to 11.5) | 2.6 (1.5 to 3.8)    |
| Comoros                  | 3.9 (2.7 to 5.1)           | 4.1 (3.1 to 5.3)                        | 2.7 (1.8 to 3.7)              | 2.7 (1.5 to 4.0)  | 0.9 (0.5 to 1.3)    |
| Congo                    | 7.3 (5.1 to 9.7)           | 7.8 (5.8 to 10.0)                       | 5.1 (3.4 to 6.9)              | 5.1 (2.9 to 7.5)  | 1.7 (0.9 to 2.5)    |
| Cook Islands             | 4.9 (3.3 to 6.7)           | 5.3 (3.7 to 7.0)                        | 3.4 (2.2 to 4.8)              | 3.4 (1.8 to 5.3)  | 1.1 (0.6 to 1.7)    |
| Costa Rica               | 11.4 (8.5 to 14.7)         | 12.2 (9.5 to 15.0)                      | 8.1 (5.6 to 10.9)             | 8.1 (4.6 to 11.9) | 2.7 (1.6 to 3.9)    |
| Cote d'Ivoire            | 8.5 (6.2 to 10.9)          | 9.0 (7.0 to 11.3)                       | 5.9 (4.1 to 8.0)              | 5.9 (3.4 to 8.8)  | 2.0 (1.1 to 2.9)    |
| Croatia                  | 8.0 (5.7 to 10.6)          | 8.5 (6.4 to 10.9)                       | 5.6 (3.8 to 7.7)              | 5.6 (3.1 to 8.4)  | 1.8 (1.0 to 2.7)    |
| Cuba                     | 9.5 (6.8 to 12.3)          | 10.0 (7.6 to 12.6)                      | 6.6 (4.4 to 9.0)              | 6.6 (3.7 to 9.7)  | 2.2 (1.2 to 3.2)    |

|                                  |                     |                     |                    |                    |                  |
|----------------------------------|---------------------|---------------------|--------------------|--------------------|------------------|
| Cyprus                           | 11.1 (8.2 to 14.2)  | 11.8 (9.2 to 14.5)  | 7.8 (5.4 to 10.4)  | 7.8 (4.5 to 11.4)  | 2.6 (1.5 to 3.8) |
| Czech Republic                   | 8.0 (5.7 to 10.6)   | 8.5 (6.5 to 10.8)   | 5.6 (3.7 to 7.7)   | 5.6 (3.2 to 8.3)   | 1.8 (1.0 to 2.7) |
| Democratic Republic of the Congo | 6.3 (4.5 to 8.2)    | 6.7 (5.0 to 8.5)    | 4.3 (2.9 to 5.9)   | 4.3 (2.5 to 6.5)   | 1.4 (0.8 to 2.1) |
| Denmark                          | 7.4 (5.3 to 9.6)    | 7.9 (6.0 to 9.9)    | 5.1 (3.5 to 7.0)   | 5.1 (2.9 to 7.7)   | 1.7 (1.0 to 2.5) |
| Dominica                         | 5.7 (4.0 to 7.6)    | 6.1 (4.4 to 7.9)    | 3.9 (2.6 to 5.5)   | 3.9 (2.2 to 6.0)   | 1.3 (0.7 to 2.0) |
| Dominican Republic               | 9.8 (7.2 to 12.9)   | 10.5 (8.0 to 13.2)  | 6.9 (4.7 to 9.4)   | 6.9 (3.9 to 10.2)  | 2.3 (1.3 to 3.4) |
| Ecuador                          | 7.1 (4.9 to 9.5)    | 7.5 (5.5 to 9.8)    | 4.9 (3.2 to 6.9)   | 4.9 (2.7 to 7.4)   | 1.6 (0.9 to 2.4) |
| Egypt                            | 8.0 (5.7 to 10.6)   | 8.5 (6.2 to 11.0)   | 5.6 (3.7 to 7.7)   | 5.6 (3.1 to 8.4)   | 1.8 (1.0 to 2.8) |
| Eritrea                          | 5.9 (4.5 to 7.5)    | 6.3 (5.0 to 7.7)    | 4.1 (2.9 to 5.5)   | 4.1 (2.4 to 6.0)   | 1.3 (0.8 to 1.9) |
| Estonia                          | 8.2 (6.0 to 10.8)   | 8.8 (6.6 to 11.1)   | 5.7 (3.9 to 7.9)   | 5.7 (3.2 to 8.6)   | 1.9 (1.1 to 2.8) |
| Ethiopia                         | 4.0 (3.0 to 5.2)    | 4.3 (3.3 to 5.3)    | 2.8 (1.9 to 3.7)   | 2.8 (1.6 to 4.1)   | 0.9 (0.5 to 1.3) |
| Fiji                             | 4.7 (3.1 to 6.4)    | 5.0 (3.4 to 6.6)    | 3.2 (2.1 to 4.6)   | 3.2 (1.7 to 5.0)   | 1.0 (0.6 to 1.6) |
| Finland                          | 4.4 (3.2 to 5.9)    | 4.7 (3.5 to 6.1)    | 3.1 (2.1 to 4.2)   | 3.1 (1.7 to 4.6)   | 1.0 (0.6 to 1.5) |
| France                           | 7.6 (5.5 to 9.9)    | 8.1 (6.2 to 10.2)   | 5.3 (3.6 to 7.2)   | 5.3 (3.0 to 7.9)   | 1.7 (1.0 to 2.6) |
| French Polynesia                 | 4.8 (3.2 to 6.6)    | 5.1 (3.6 to 6.8)    | 3.3 (2.1 to 4.7)   | 3.3 (1.8 to 5.0)   | 1.1 (0.6 to 1.6) |
| Gabon                            | 6.6 (4.5 to 9.0)    | 7.1 (5.0 to 9.3)    | 4.6 (3.0 to 6.5)   | 4.6 (2.5 to 7.0)   | 1.5 (0.8 to 2.3) |
| Gambia                           | 5.6 (3.9 to 7.5)    | 6.0 (4.4 to 7.7)    | 3.9 (2.5 to 5.3)   | 3.9 (2.2 to 5.8)   | 1.3 (0.7 to 1.9) |
| Georgia                          | 4.8 (3.2 to 6.6)    | 5.1 (3.5 to 6.8)    | 3.3 (2.1 to 4.7)   | 3.3 (1.8 to 5.1)   | 1.1 (0.6 to 1.6) |
| Germany                          | 10.6 (8.0 to 13.5)  | 11.2 (8.9 to 13.9)  | 7.4 (5.1 to 9.9)   | 7.4 (4.3 to 11.0)  | 2.5 (1.4 to 3.6) |
| Ghana                            | 5.8 (4.2 to 7.4)    | 6.1 (4.7 to 7.7)    | 4.0 (2.7 to 5.4)   | 4.0 (2.3 to 5.9)   | 1.3 (0.7 to 1.9) |
| Greece                           | 9.6 (7.1 to 12.3)   | 10.2 (7.9 to 12.7)  | 6.7 (4.7 to 9.0)   | 6.7 (3.9 to 10.0)  | 2.2 (1.3 to 3.3) |
| Grenada                          | 7.4 (5.1 to 9.9)    | 7.9 (5.8 to 10.3)   | 5.2 (3.4 to 7.2)   | 5.2 (2.9 to 7.9)   | 1.7 (0.9 to 2.6) |
| Guatemala                        | 9.4 (6.6 to 12.5)   | 10.0 (7.4 to 12.9)  | 6.6 (4.4 to 9.1)   | 6.6 (3.7 to 10.0)  | 2.2 (1.2 to 3.3) |
| Guinea                           | 3.9 (2.7 to 5.3)    | 4.2 (3.0 to 5.5)    | 2.7 (1.8 to 3.8)   | 2.7 (1.5 to 4.1)   | 0.9 (0.5 to 1.3) |
| Hungary                          | 9.7 (7.1 to 12.7)   | 10.4 (7.9 to 13.0)  | 6.8 (4.7 to 9.2)   | 6.8 (3.8 to 10.2)  | 2.3 (1.3 to 3.4) |
| India                            | 8.7 (5.5 to 12.3)   | 9.3 (6.1 to 12.8)   | 6.1 (3.7 to 8.9)   | 6.1 (3.2 to 9.6)   | 2.0 (1.0 to 3.1) |
| Indonesia                        | 6.0 (4.0 to 8.2)    | 6.4 (4.4 to 8.5)    | 4.1 (2.6 to 5.9)   | 4.1 (2.2 to 6.4)   | 1.3 (0.7 to 2.1) |
| Iran (Islamic Republic of)       | 8.5 (6.1 to 11.2)   | 9.1 (6.8 to 11.6)   | 5.9 (4.0 to 8.1)   | 5.9 (3.3 to 8.9)   | 2.0 (1.1 to 2.9) |
| Iraq                             | 12.7 (9.6 to 16.2)  | 13.5 (10.7 to 16.5) | 9.0 (6.3 to 12.0)  | 9.0 (5.3 to 13.2)  | 3.0 (1.8 to 4.4) |
| Ireland                          | 8.4 (6.2 to 10.8)   | 8.9 (6.9 to 11.1)   | 5.9 (4.0 to 7.9)   | 5.9 (3.4 to 8.8)   | 1.9 (1.1 to 2.8) |
| Italy                            | 10.4 (7.8 to 13.3)  | 11.1 (8.7 to 13.6)  | 7.3 (5.1 to 9.7)   | 7.3 (4.2 to 10.7)  | 2.4 (1.4 to 3.5) |
| Jamaica                          | 8.4 (6.1 to 11.1)   | 8.9 (6.7 to 11.4)   | 5.8 (3.9 to 8.0)   | 5.8 (3.3 to 8.7)   | 1.9 (1.1 to 2.9) |
| Japan                            | 9.0 (5.1 to 13.5)   | 9.6 (5.6 to 14.0)   | 6.3 (3.5 to 9.7)   | 6.3 (3.0 to 10.4)  | 2.1 (1.0 to 3.4) |
| Jordan                           | 3.2 (2.1 to 4.5)    | 3.5 (2.4 to 4.6)    | 2.2 (1.4 to 3.2)   | 2.2 (1.2 to 3.4)   | 0.7 (0.4 to 1.1) |
| Kazakhstan                       | 7.2 (4.8 to 9.7)    | 7.6 (5.3 to 10.1)   | 5.0 (3.2 to 7.0)   | 5.0 (2.7 to 7.7)   | 1.6 (0.9 to 2.5) |
| Kenya                            | 4.1 (3.1 to 5.3)    | 4.4 (3.5 to 5.4)    | 2.8 (2.0 to 3.8)   | 2.8 (1.6 to 4.2)   | 0.9 (0.5 to 1.3) |
| Kiribati                         | 10.2 (7.3 to 13.5)  | 10.8 (8.1 to 13.8)  | 7.1 (4.8 to 9.8)   | 7.1 (4.0 to 10.7)  | 2.4 (1.3 to 3.5) |
| Kuwait                           | 15.8 (12.1 to 19.8) | 16.7 (13.6 to 20.2) | 11.3 (8.0 to 15.0) | 11.3 (6.6 to 16.5) | 3.9 (2.3 to 5.6) |
| Kyrgyzstan                       | 3.8 (2.3 to 5.4)    | 4.0 (2.6 to 5.6)    | 2.6 (1.5 to 3.8)   | 2.6 (1.3 to 4.1)   | 0.8 (0.4 to 1.3) |
| Lao People's Democratic Republic | 4.4 (3.2 to 5.8)    | 4.7 (3.5 to 6.0)    | 3.0 (2.0 to 4.1)   | 3.0 (1.7 to 4.5)   | 1.0 (0.5 to 1.5) |
| Latvia                           | 7.6 (5.4 to 10.1)   | 8.1 (6.0 to 10.5)   | 5.3 (3.5 to 7.3)   | 5.3 (3.0 to 8.0)   | 1.7 (1.0 to 2.6) |
| Lebanon                          | 9.3 (6.6 to 12.3)   | 9.8 (7.4 to 12.6)   | 6.5 (4.4 to 8.8)   | 6.5 (3.6 to 9.8)   | 2.1 (1.2 to 3.2) |
| Lesotho                          | 1.7 (1.2 to 2.4)    | 1.9 (1.3 to 2.5)    | 1.2 (0.8 to 1.7)   | 1.2 (0.6 to 1.8)   | 0.4 (0.2 to 0.6) |

|                                  |                    |                    |                   |                   |                  |
|----------------------------------|--------------------|--------------------|-------------------|-------------------|------------------|
| Liberia                          | 6.6 (4.7 to 8.7)   | 7.0 (5.3 to 8.9)   | 4.6 (3.1 to 6.2)  | 4.6 (2.6 to 6.8)  | 1.5 (0.8 to 2.2) |
| Libya                            | 9.3 (6.6 to 12.4)  | 9.8 (7.3 to 12.7)  | 6.5 (4.3 to 8.9)  | 6.5 (3.7 to 9.9)  | 2.2 (1.2 to 3.2) |
| Lithuania                        | 6.9 (4.9 to 9.2)   | 7.4 (5.5 to 9.5)   | 4.8 (3.2 to 6.6)  | 4.8 (2.7 to 7.2)  | 1.6 (0.9 to 2.3) |
| Luxembourg                       | 7.4 (5.4 to 9.6)   | 7.9 (6.0 to 9.9)   | 5.1 (3.5 to 7.0)  | 5.1 (2.9 to 7.6)  | 1.7 (1.0 to 2.5) |
| Madagascar                       | 4.6 (3.3 to 6.1)   | 4.9 (3.7 to 6.3)   | 3.2 (2.1 to 4.4)  | 3.2 (1.8 to 4.7)  | 1.0 (0.6 to 1.5) |
| Malawi                           | 4.2 (3.2 to 5.3)   | 4.5 (3.6 to 5.5)   | 2.9 (2.0 to 3.8)  | 2.9 (1.7 to 4.2)  | 0.9 (0.5 to 1.4) |
| Malaysia                         | 9.8 (7.0 to 12.9)  | 10.4 (7.8 to 13.4) | 6.9 (4.6 to 9.4)  | 6.9 (3.9 to 10.4) | 2.3 (1.3 to 3.4) |
| Maldives                         | 7.8 (5.4 to 10.7)  | 8.3 (5.9 to 11.0)  | 5.4 (3.5 to 7.7)  | 5.4 (3.0 to 8.4)  | 1.8 (1.0 to 2.7) |
| Mali                             | 10.2 (7.6 to 13.0) | 10.8 (8.5 to 13.4) | 7.1 (4.9 to 9.5)  | 7.1 (4.2 to 10.5) | 2.4 (1.4 to 3.5) |
| Malta                            | 10.5 (7.7 to 13.5) | 11.1 (8.6 to 13.9) | 7.3 (5.0 to 9.9)  | 7.3 (4.2 to 10.9) | 2.4 (1.4 to 3.6) |
| Marshall Islands                 | 10.9 (7.7 to 14.3) | 11.5 (8.7 to 14.7) | 7.6 (5.2 to 10.4) | 7.6 (4.3 to 11.4) | 2.5 (1.4 to 3.8) |
| Mauritania                       | 10.4 (7.7 to 13.4) | 11.0 (8.6 to 13.7) | 7.3 (5.0 to 9.8)  | 7.3 (4.2 to 10.7) | 2.4 (1.4 to 3.5) |
| Mauritius                        | 7.7 (5.4 to 10.2)  | 8.2 (6.1 to 10.5)  | 5.4 (3.6 to 7.4)  | 5.4 (3.0 to 8.1)  | 1.8 (1.0 to 2.7) |
| Mexico                           | 7.5 (5.4 to 9.8)   | 8.0 (6.1 to 10.1)  | 5.2 (3.6 to 7.1)  | 5.2 (3.0 to 7.9)  | 1.7 (1.0 to 2.5) |
| Micronesia (Federated States of) | 9.3 (6.7 to 12.3)  | 9.9 (7.3 to 12.7)  | 6.5 (4.4 to 9.0)  | 6.5 (3.7 to 9.8)  | 2.2 (1.2 to 3.2) |
| Mongolia                         | 5.0 (3.5 to 6.7)   | 5.3 (3.8 to 6.9)   | 3.4 (2.3 to 4.8)  | 3.4 (1.9 to 5.2)  | 1.1 (0.6 to 1.7) |
| Morocco                          | 6.8 (4.6 to 9.4)   | 7.3 (5.1 to 9.7)   | 4.7 (3.0 to 6.7)  | 4.7 (2.5 to 7.3)  | 1.6 (0.8 to 2.4) |
| Mozambique                       | 1.5 (1.0 to 2.1)   | 1.7 (1.2 to 2.2)   | 1.1 (0.7 to 1.59) | 1.1 (0.6 to 1.6)  | 0.3 (0.2 to 0.5) |
| Myanmar                          | 2.9 (1.9 to 4.1)   | 3.1 (2.1 to 4.2)   | 2.0 (1.2 to 2.9)  | 2.0 (1.1 to 3.1)  | 0.6 (0.3 to 1.0) |
| Namibia                          | 8.6 (6.2 to 11.2)  | 9.1 (6.9 to 11.5)  | 6.0 (4.1 to 8.1)  | 6.0 (3.4 to 8.9)  | 2.0 (1.1 to 2.9) |
| Nauru                            | 10.5 (7.4 to 14.1) | 11.2 (8.3 to 14.6) | 7.4 (4.9 to 10.2) | 7.4 (4.2 to 11.2) | 2.5 (1.4 to 3.7) |
| Nepal                            | 3.6 (2.7 to 4.6)   | 3.9 (3.1 to 4.8)   | 2.5 (1.7 to 3.3)  | 2.5 (1.4 to 3.6)  | 0.8 (0.5 to 1.2) |
| Netherlands                      | 7.1 (5.2 to 9.3)   | 7.5 (5.7 to 9.5)   | 4.9 (3.3 to 6.7)  | 4.9 (2.8 to 7.3)  | 1.6 (0.9 to 2.4) |
| New Zealand                      | 10.6 (8.0 to 13.7) | 11.3 (8.9 to 13.9) | 7.5 (5.2 to 10.0) | 7.5 (4.3 to 11.0) | 2.5 (1.4 to 3.6) |
| Niger                            | 5.9 (4.1 to 8.0)   | 6.3 (4.5 to 8.3)   | 4.1 (2.6 to 5.7)  | 4.1 (2.3 to 6.2)  | 1.3 (0.7 to 2.0) |
| Nigeria                          | 7.1 (5.1 to 9.2)   | 7.5 (5.7 to 9.5)   | 4.9 (3.3 to 6.7)  | 4.9 (2.8 to 7.4)  | 1.6 (0.9 to 2.4) |
| Niue                             | 1.9 (1.2 to 2.7)   | 2.0 (1.4 to 2.8)   | 1.3 (0.8 to 1.9)  | 1.3 (0.7 to 2.1)  | 0.4 (0.2 to 0.7) |
| Norway                           | 8.2 (6.0 to 10.6)  | 8.7 (6.7 to 10.9)  | 5.7 (3.9 to 7.7)  | 5.7 (3.2 to 8.4)  | 1.9 (1.1 to 2.7) |
| Oman                             | 8.4 (6.0 to 11.3)  | 9.0 (6.7 to 11.6)  | 5.9 (3.9 to 8.1)  | 5.9 (3.3 to 8.9)  | 1.9 (1.1 to 2.9) |
| Pakistan                         | 8.6 (5.3 to 12.5)  | 9.2 (5.9 to 12.9)  | 6.0 (3.6 to 8.9)  | 6.0 (3.1 to 9.7)  | 2.0 (1.0 to 3.2) |
| Palau                            | 10.3 (7.3 to 13.6) | 10.9 (8.2 to 14.1) | 7.2 (4.8 to 9.9)  | 7.2 (4.1 to 10.8) | 2.4 (1.3 to 3.6) |
| Papua New Guinea                 | 4.0 (2.4 to 5.7)   | 4.3 (2.7 to 6.0)   | 2.7 (1.6 to 4.1)  | 2.7 (1.4 to 4.4)  | 0.9 (0.4 to 1.4) |
| Paraguay                         | 9.5 (6.8 to 12.5)  | 10.1 (7.6 to 12.8) | 6.6 (4.5 to 9.1)  | 6.6 (3.7 to 10.0) | 2.2 (1.2 to 3.3) |
| Philippines                      | 10.0 (7.3 to 13.1) | 10.6 (8.1 to 13.4) | 7.0 (4.8 to 9.6)  | 7.0 (3.9 to 10.5) | 2.3 (1.3 to 3.4) |
| Poland                           | 8.3 (6.0 to 11.1)  | 8.9 (6.7 to 11.4)  | 5.8 (3.9 to 8.0)  | 5.8 (3.3 to 8.7)  | 1.9 (1.1 to 2.8) |
| Portugal                         | 10.8 (7.9 to 14.0) | 11.5 (9.0 to 14.4) | 7.6 (5.3 to 10.3) | 7.6 (4.4 to 11.3) | 2.5 (1.5 to 3.7) |
| Qatar                            | 9.3 (6.6 to 12.3)  | 9.9 (7.4 to 12.7)  | 6.5 (4.4 to 9.0)  | 6.5 (3.7 to 9.9)  | 2.2 (1.2 to 3.2) |
| Republic of Korea                | 9.0 (5.3 to 13.3)  | 9.6 (5.8 to 13.7)  | 6.3 (3.5 to 9.5)  | 6.3 (3.1 to 10.3) | 2.1 (1.0 to 3.4) |
| Republic of Moldova              | 3.1 (2.1 to 4.3)   | 3.3 (2.3 to 4.5)   | 2.1 (1.3 to 3.2)  | 2.1 (1.1 to 3.3)  | 0.7 (0.4 to 1.1) |
| Romania                          | 9.0 (6.5 to 11.8)  | 9.6 (7.3 to 12.1)  | 6.3 (4.3 to 8.7)  | 6.3 (3.6 to 9.4)  | 2.1 (1.2 to 3.1) |
| Russian Federation               | 4.6 (3.2 to 6.1)   | 4.9 (3.5 to 6.4)   | 3.2 (2.1 to 4.4)  | 3.2 (1.8 to 4.8)  | 1.0 (0.6 to 1.5) |
| Rwanda                           | 3.9 (2.7 to 5.3)   | 4.2 (3.1 to 5.45)  | 2.7 (1.8 to 3.8)  | 2.7 (1.5 to 4.1)  | 0.9 (0.5 to 1.3) |
| Saint Kitts & Nevis              | 8.3 (5.8, 10.9)    | 8.8 (6.5 to 11.4)  | 5.8 (3.8 to 8.0)  | 5.8 (3.2 to 8.7)  | 1.9 (1.1 to 2.8) |

|                                    |                    |                     |                   |                   |                  |
|------------------------------------|--------------------|---------------------|-------------------|-------------------|------------------|
| Saint Lucia                        | 10.0 (7.1 to 13.2) | 10.7 (7.9 to 13.7)  | 7.0 (4.7 to 9.7)  | 7.0 (4.0 to 10.6) | 2.3 (1.3 to 3.5) |
| Samoa                              | 3.4 (2.2 to 4.8)   | 3.6 (2.5 to 5.0)    | 2.3 (1.4 to 3.4)  | 2.3 (1.3 to 3.7)  | 0.8 (0.4 to 1.2) |
| Sao Tome & Principe                | 4.2 (2.9 to 5.6)   | 4.4 (3.2 to 5.8)    | 2.9 (1.9 to 4.0)  | 2.9 (1.6 to 4.4)  | 0.9 (0.5 to 1.4) |
| Saudi Arabia                       | 12.9 (9.7 to 16.6) | 13.7 (10.9 to 16.9) | 9.2 (6.4 to 12.2) | 9.2 (5.3 to 13.5) | 3.1 (1.8 to 4.5) |
| Senegal                            | 6.1 (4.5 to 7.8)   | 6.5 (5.0 to 8.1)    | 4.2 (2.9 to 5.6)  | 4.2 (2.4 to 6.2)  | 1.4 (0.8 to 2.0) |
| Serbia                             | 10.0 (7.1 to 13.1) | 10.6 (8.1 to 13.5)  | 7.0 (4.7 to 9.5)  | 7.1 (3.9 to 10.5) | 2.3 (1.3 to 3.4) |
| Seychelles                         | 5.0 (3.4 to 6.9)   | 5.3 (3.8 to 7.0)    | 3.5 (2.2 to 4.9)  | 3.5 (1.9 to 5.3)  | 1.1 (0.6 to 1.7) |
| Sierra Leone                       | 3.9 (2.7 to 5.2)   | 4.1 (3.0 to 5.3)    | 2.7 (1.7 to 3.7)  | 2.7 (1.5 to 4.0)  | 0.9 (0.5 to 1.3) |
| Singapore                          | 9.3 (5.5 to 13.5)  | 9.9 (6.0 to 14.1)   | 6.5 (3.6 to 9.8)  | 6.5 (3.1 to 10.6) | 2.1 (1.1 to 3.5) |
| Slovakia                           | 8.9 (6.5 to 11.7)  | 9.5 (7.2 to 11.9)   | 6.2 (4.2 to 8.5)  | 6.2 (3.5 to 9.3)  | 2.1 (1.2 to 3.0) |
| Slovenia                           | 8.3 (5.9 to 10.9)  | 8.8 (6.7 to 11.2)   | 5.8 (3.9 to 7.8)  | 5.8 (3.3 to 8.7)  | 1.9 (1.1 to 2.8) |
| Solomon Islands                    | 4.9 (3.2 to 6.7)   | 5.2 (3.6 to 6.9)    | 3.3 (2.1 to 4.8)  | 3.3 (1.8 to 5.2)  | 1.1 (0.6 to 1.7) |
| South Africa                       | 9.7 (7.1 to 12.7)  | 10.3 (7.8 to 12.9)  | 6.8 (4.6 to 9.2)  | 6.8 (3.9 to 10.1) | 2.2 (1.3 to 3.3) |
| Spain                              | 7.0 (5.1 to 9.2)   | 7.4 (5.7 to 9.4)    | 4.9 (3.3 to 6.6)  | 4.9 (2.7 to 7.3)  | 1.6 (0.9 to 2.4) |
| Sri Lanka                          | 7.5 (5.2 to 10.2)  | 8.0 (5.7 to 10.5)   | 5.2 (3.4 to 7.3)  | 5.2 (2.9 to 7.9)  | 1.7 (0.9 to 2.6) |
| State of Palestine                 | 10.2 (7.4 to 13.2) | 10.8 (8.3 to 13.6)  | 7.2 (4.9 to 9.7)  | 7.2 (4.1 to 10.6) | 2.4 (1.4 to 3.5) |
| Suriname                           | 11.1 (8.2 to 14.3) | 11.8 (9.2 to 14.6)  | 7.8 (5.4 to 10.5) | 7.8 (4.5 to 11.5) | 2.6 (1.5 to 3.8) |
| Swaziland                          | 7.3 (5.4 to 9.4)   | 7.8 (6.1 to 9.6)    | 5.1 (3.5 to 6.8)  | 5.1 (2.9 to 7.4)  | 1.7 (0.9 to 2.4) |
| Sweden                             | 6.1 (4.4 to 8.0)   | 6.5 (4.9 to 8.3)    | 4.2 (2.9 to 5.8)  | 4.2 (2.4 to 6.3)  | 1.4 (0.8 to 2.0) |
| Switzerland                        | 6.2 (4.4 to 8.3)   | 6.6 (4.9 to 8.5)    | 4.3 (2.9 to 6.0)  | 4.3 (2.4 to 6.6)  | 1.4 (0.8 to 2.1) |
| Tajikistan                         | 7.6 (5.2 to 10.3)  | 8.1 (5.8 to 10.6)   | 5.3 (3.4 to 7.4)  | 5.3 (2.9 to 8.1)  | 1.7 (0.9 to 2.6) |
| Thailand                           | 6.4 (4.5 to 8.7)   | 6.8 (5.0 to 9.0)    | 4.5 (2.9 to 6.3)  | 4.5 (2.5 to 6.9)  | 1.5 (0.8 to 2.2) |
| Timor-Leste                        | 4.8 (3.1 to 6.6)   | 5.1 (3.4 to 6.9)    | 3.3 (2.0 to 4.8)  | 3.3 (1.7 to 5.1)  | 1.1 (0.5 to 1.7) |
| Togo                               | 2.7 (1.9 to 3.6)   | 2.9 (2.1 to 3.7)    | 1.8 (1.2 to 2.6)  | 1.8 (1.0 to 2.8)  | 0.6 (0.3 to 0.9) |
| Tokelau                            | 3.0 (1.9 to 4.3)   | 3.2 (2.1 to 4.4)    | 2.1 (1.2 to 3.1)  | 2.1 (1.1 to 3.3)  | 0.7 (0.3 to 1.1) |
| Tonga                              | 4.7 (3.1 to 6.4)   | 5.0 (3.4 to 6.6)    | 3.2 (2.0 to 4.6)  | 3.2 (1.7 to 4.9)  | 1.0 (0.6 to 1.6) |
| Trinidad and Tobago                | 9.7 (6.7 to 13.1)  | 10.3 (7.4 to 13.5)  | 6.8 (4.4 to 9.5)  | 6.8 (3.7 to 10.3) | 2.2 (1.2 to 3.4) |
| Tunisia                            | 7.8 (5.6 to 10.5)  | 8.4 (6.2 to 10.7)   | 5.5 (3.6 to 7.6)  | 5.5 (3.1 to 8.3)  | 1.8 (1.0 to 2.7) |
| Turkey                             | 7.9 (5.6 to 10.5)  | 8.4 (6.3 to 10.9)   | 5.5 (3.7 to 7.6)  | 5.5 (3.1 to 8.3)  | 1.8 (1.0 to 2.7) |
| Tuvalu                             | 7.1 (4.9 to 9.5)   | 7.6 (5.5 to 9.9)    | 4.9 (3.3 to 6.9)  | 4.9 (2.7 to 7.6)  | 1.6 (0.9 to 2.4) |
| Uganda                             | 1.5 (1.0 to 2.1)   | 1.6 (1.1 to 2.2)    | 1.0 (0.7 to 1.5)  | 1.0 (0.6 to 1.6)  | 0.3 (0.2 to 0.5) |
| Ukraine                            | 5.2 (3.5 to 7.2)   | 5.6 (3.9 to 7.4)    | 3.6 (2.3 to 5.1)  | 3.6 (2.0 to 5.6)  | 1.2 (0.6 to 1.8) |
| United Arab Emirates               | 10.4 (7.6 to 13.6) | 11.1 (8.5 to 13.9)  | 7.3 (5.0 to 9.9)  | 7.3 (4.1 to 10.9) | 2.4 (1.4 to 3.6) |
| United Kingdom                     | 9.1 (6.8 to 11.8)  | 9.7 (7.6 to 12.1)   | 6.4 (4.4 to 8.6)  | 6.4 (3.7 to 9.4)  | 2.1 (1.2 to 3.1) |
| United Republic of Tanzania        | 1.8 (1.2 to 2.4)   | 1.9 (1.4 to 2.5)    | 1.2 (0.8 to 1.7)  | 1.2 (0.7 to 1.9)  | 0.4 (0.2 to 0.6) |
| United States of America           | 10.1 (7.5 to 12.9) | 10.7 (8.3 to 13.2)  | 7.1 (4.9 to 9.5)  | 7.1 (4.0 to 10.6) | 2.3 (1.3 to 3.4) |
| Uruguay                            | 5.9 (4.2 to 7.9)   | 6.3 (4.6 to 8.1)    | 4.1 (2.7 to 5.7)  | 4.1 (2.3 to 6.2)  | 1.3 (0.7 to 2.0) |
| Uzbekistan                         | 5.1 (3.3 to 7.1)   | 5.4 (3.7 to 7.3)    | 3.5 (2.2 to 5.0)  | 3.5 (1.8 to 5.5)  | 1.1 (0.6 to 1.8) |
| Vanuatu                            | 2.2 (1.4 to 3.1)   | 2.3 (1.5 to 3.2)    | 1.5 (0.9 to 2.2)  | 1.5 (0.8 to 2.4)  | 0.5 (0.3 to 0.8) |
| Venezuela (Bolivarian Republic of) | 8.1 (5.8 to 10.8)  | 8.6 (6.3 to 11.2)   | 5.6 (3.7 to 7.8)  | 5.6 (3.1 to 8.5)  | 1.9 (1.0 to 2.8) |
| Viet Nam                           | 6.6 (4.6 to 9.0)   | 7.1 (5.2 to 9.3)    | 4.6 (3.0 to 6.5)  | 4.6 (2.6 to 7.0)  | 1.5 (0.8 to 2.3) |
| Zambia                             | 5.8 (4.3 to 7.6)   | 6.2 (4.8 to 7.8)    | 4.0 (2.8 to 5.5)  | 4.0 (2.3 to 6.0)  | 1.3 (0.7 to 1.9) |
| Zimbabwe                           | 7.0 (4.9 to 9.3)   | 7.4 (5.5 to 9.6)    | 4.9 (3.2 to 6.8)  | 4.9 (2.7 to 7.4)  | 1.6 (0.9 to 2.4) |

**Supplementary Table 2. Population Attributable Risks for Physical Inactivity and General Cancer Outcomes  
by Country**

| <b>Country</b>           | <b>Bladder Cancer</b> | <b>Colon Cancer</b> | <b>Esophageal Cancer</b> | <b>Gastric Cancer</b> | <b>Renal Cancer</b> |
|--------------------------|-----------------------|---------------------|--------------------------|-----------------------|---------------------|
| Algeria                  | 2.6 (-1.6 to 7.5)     | 3.6 (1.4 to 6.0)    | 8.6 (-3.1 to 25.7)       | 8.3 (-0.2 to 20.1)    | 8.6 (2.8 to 15.7)   |
| American Samoa           | 4.1 (-2.3 to 11.4)    | 5.6 (2.2 to 9.3)    | 13.0 (-4.5 to 39.0)      | 12.6 (-0.6 to 30.4)   | 13.0 (4.2 to 23.6)  |
| Andorra                  | 3.0 (-1.7 to 8.4)     | 4.1 (1.6 to 6.7)    | 9.7 (-3.5 to 29.1)       | 9.4 (-0.4 to 22.8)    | 9.7 (3.1 to 17.7)   |
| Argentina                | 3.2 (-1.8 to 9.0)     | 4.4 (1.7 to 7.3)    | 10.4 (-3.6 to 31.1)      | 10.1 (-0.2 to 24.0)   | 10.4 (3.5 to 19.1)  |
| Armenia                  | 1.8 (-1.0 to 5.1)     | 2.4 (0.9 to 4.2)    | 6.0 (-2.0 to 17.9)       | 5.8 (-0.2 to 13.9)    | 6.0 (1.9 to 11.1)   |
| Australia                | 2.4 (-1.4 to 6.8)     | 3.2 (1.3 to 5.5)    | 7.8 (-2.9 to 23.2)       | 7.6 (-0.3 to 18.1)    | 7.8 (2.7 to 14.3)   |
| Austria                  | 2.4 (-1.4 to 6.6)     | 3.2 (1.3 to 5.4)    | 7.8 (-2.8 to 22.7)       | 7.5 (-0.3 to 17.9)    | 7.8 (2.5 to 14.2)   |
| Bahamas                  | 3.4 (-1.8 to 9.5)     | 4.6 (1.8 to 7.6)    | 10.8 (-3.7 to 32.2)      | 10.5 (-0.5 to 24.9)   | 10.8 (3.5 to 19.8)  |
| Bangladesh               | 2.2 (-1.3 to 6.3)     | 3.0 (1.1 to 5.3)    | 7.2 (-2.5 to 22.0)       | 7.0 (-0.3 to 17.4)    | 7.2 (2.3 to 13.8)   |
| Barbados                 | 3.3 (-1.9 to 9.3)     | 4.5 (1.8 to 7.6)    | 10.7 (-3.6 to 31.5)      | 10.4 (-0.5 to 25.2)   | 10.7 (3.5 to 19.5)  |
| Belarus                  | 1.1 (-0.7 to 3.3)     | 1.5 (0.6 to 2.7)    | 3.8 (-1.2 to 11.3)       | 3.7 (-0.2 to 9.0)     | 3.8 (1.2 to 7.1)    |
| Belgium                  | 2.8 (-1.6 to 7.8)     | 3.8 (1.5 to 6.4)    | 9.1 (-3.4 to 27.1)       | 8.8 (-0.4 to 21.3)    | 9.1 (2.9 to 16.5)   |
| Benin                    | 1.3 (-0.7 to 3.6)     | 1.7 (0.7 to 3.0)    | 4.3 (-1.5 to 12.8)       | 4.1 (-0.1 to 9.7)     | 4.3 (1.4 to 7.9)    |
| Bermuda                  | 2.1 (-1.2 to 5.9)     | 2.8 (1.1 to 4.9)    | 6.8 (-2.4 to 20.5)       | 6.6 (-0.3 to 15.9)    | 6.8 (2.2 to 12.7)   |
| Bhutan                   | 1.8 (-1.1 to 5.1)     | 2.5 (1.0 to 4.2)    | 6.1 (-2.1 to 17.9)       | 5.9 (-0.3 to 13.9)    | 6.1 (2.0 to 11.0)   |
| Bosnia & Herzegovina     | 2.0 (-1.1 to 5.7)     | 2.7 (1.1 to 4.7)    | 6.7 (-2.3 to 20.0)       | 6.4 (-0.3 to 15.7)    | 6.7 (2.2 to 12.4)   |
| Botswana                 | 1.7 (-0.9 to 4.8)     | 2.3 (0.9 to 3.9)    | 5.7 (-2.1 to 17.2)       | 5.5 (-0.2 to 13.2)    | 5.7 (1.9 to 10.4)   |
| Brazil                   | 3.6 (-2.2 to 10.1)    | 4.9 (2.0 to 8.2)    | 11.6 (-3.7 to 34.6)      | 11.3 (-0.6 to 27.2)   | 11.6 (3.9 to 21.1)  |
| British Virgin Islands   | 2.1 (-1.2 to 6.1)     | 2.9 (1.2 to 5.0)    | 7.1 (-2.4 to 21.3)       | 6.9 (-0.3 to 16.8)    | 7.1 (2.3 to 13.0)   |
| Brunei Darussalam        | 2.1 (-1.2 to 6.3)     | 2.9 (1.1 to 5.1)    | 7.1 (-2.5 to 21.4)       | 6.9 (-0.3 to 16.8)    | 7.1 (2.2 to 13.5)   |
| Bulgaria                 | 3.0 (-1.7 to 8.6)     | 4.1 (1.6 to 6.9)    | 9.8 (-3.3 to 29.0)       | 9.4 (-0.5 to 22.6)    | 9.8 (3.2 to 17.7)   |
| Burkina Faso             | 1.6 (-0.9 to 4.6)     | 2.2 (0.9 to 3.7)    | 5.4 (-1.9 to 15.9)       | 5.2 (-0.3 to 12.4)    | 5.4 (1.7 to 9.9)    |
| Cabo Verde               | 1.6 (-0.9 to 4.4)     | 2.1 (0.8 to 3.6)    | 5.2 (-1.7 to 15.6)       | 5.1 (-0.2 to 11.9)    | 5.2 (1.7 to 9.6)    |
| Cambodia                 | 0.8 (-0.5 to 2.4)     | 1.1 (0.4 to 2.0)    | 2.9 (-1.0 to 8.7)        | 2.8 (-0.1 to 6.8)     | 2.9 (0.9 to 5.5)    |
| Cameroon                 | 2.2 (-1.2 to 6.3)     | 3.0 (1.2 to 5.1)    | 7.4 (-2.5 to 21.7)       | 7.2 (-0.3 to 17.0)    | 7.4 (2.5 to 13.5)   |
| Canada                   | 2.2 (-1.2 to 6.3)     | 3.1 (1.2 to 5.1)    | 7.4 (-2.6 to 22.0)       | 7.2 (-0.3 to 17.0)    | 7.4 (2.4 to 13.8)   |
| Cayman Islands           | 2.3 (-1.3 to 6.4)     | 3.1 (1.2 to 5.4)    | 7.5 (-2.6 to 22.7)       | 7.3 (-0.6 to 17.5)    | 7.5 (2.6 to 13.9)   |
| Central African Republic | 1.1 (-0.6 to 3.2)     | 1.6 (0.6 to 2.6)    | 3.9 (-1.3 to 11.7)       | 3.7 (-0.2 to 8.9)     | 3.9 (1.2 to 7.07)   |
| Chad                     | 1.8 (-1.1 to 5.3)     | 2.5 (1.0 to 4.3)    | 6.1 (-2.2 to 18.2)       | 5.9 (-0.4 to 14.2)    | 6.1 (2.0 to 11.38)  |
| Chile                    | 2.1 (-1.3 to 5.9)     | 2.8 (1.1 to 4.9)    | 6.9 (-2.4 to 20.3)       | 6.7 (-0.3 to 16.1)    | 6.9 (2.3 to 12.76)  |
| China                    | 1.1 (-0.7 to 3.2)     | 1.5 (0.6 to 2.6)    | 3.8 (-1.2 to 11.4)       | 3.7 (-0.2 to 8.9)     | 3.8 (1.2 to 7.15)   |
| Colombia                 | 3.4 (-2.0 to 9.7)     | 4.6 (1.9 to 7.7)    | 11.0 (-3.6 to 32.5)      | 10.6 (-0.3 to 25.4)   | 11.0 (3.6 to 19.7)  |
| Comoros                  | 1.1 (-0.7 to 3.2)     | 1.6 (0.6 to 2.6)    | 3.9 (-1.3 to 11.3)       | 3.7 (-0.2 to 8.9)     | 3.9 (1.3 to 7.1)    |
| Congo                    | 2.2 (-1.2 to 6.3)     | 3.0 (1.2 to 5.0)    | 7.3 (-2.6 to 21.7)       | 7.0 (-0.3 to 16.8)    | 7.3 (2.4 to 13.3)   |
| Cook Islands             | 1.5 (-0.8 to 4.2)     | 2.0 (0.8 to 3.4)    | 4.9 (-1.7 to 14.7)       | 4.8 (-0.3 to 11.5)    | 4.9 (1.7 to 9.1)    |
| Costa Rica               | 3.6 (-2.1 to 10.2)    | 4.8 (1.8 to 8.1)    | 11.4 (-4.2 to 34.1)      | 11.1 (-0.5 to 26.0)   | 11.4 (3.7 to 20.6)  |
| Cote d'Ivoire            | 2.6 (-1.5 to 7.3)     | 3.5 (1.4 to 5.9)    | 8.5 (-3.0 to 24.8)       | 8.2 (-0.3 to 19.4)    | 8.5 (2.6 to 15.5)   |
| Croatia                  | 2.4 (-1.3 to 6.8)     | 3.3 (1.3 to 5.6)    | 8.0 (-3.0 to 23.9)       | 7.8 (-0.2 to 18.4)    | 8.0 (2.6 to 14.7)   |

|                                  |                    |                   |                     |                     |                    |
|----------------------------------|--------------------|-------------------|---------------------|---------------------|--------------------|
| Cuba                             | 2.9 (-1.7 to 8.1)  | 3.9 (1.6 to 6.6)  | 9.4 (-3.2 to 27.6)  | 9.1 (-0.5 to 21.8)  | 9.4 (3.2 to 17.1)  |
| Cyprus                           | 3.4 (-1.9 to 9.9)  | 4.7 (1.8 to 7.7)  | 11.1 (-4.1 to 32.9) | 10.7 (-0.3 to 25.9) | 11.1 (3.8 to 20.0) |
| Czech Republic                   | 2.4 (-1.4 to 6.9)  | 3.3 (1.3 to 5.6)  | 8.0 (-2.6 to 24.1)  | 7.8 (-0.3 to 18.7)  | 8.0 (2.5 to 14.7)  |
| Democratic Republic of the Congo | 1.9 (-1.1 to 5.4)  | 2.6 (1.0 to 4.3)  | 6.3 (-2.2 to 18.5)  | 6.0 (-0.2 to 14.4)  | 6.3 (2.1 to 11.5)  |
| Denmark                          | 2.2 (-1.3 to 6.3)  | 3.0 (1.2 to 5.1)  | 7.4 (-2.6 to 21.9)  | 7.2 (-0.3 to 16.9)  | 7.4 (2.4 to 13.6)  |
| Dominica                         | 1.7 (-0.9 to 4.9)  | 2.3 (0.9 to 4.0)  | 5.7 (-2.0 to 17.0)  | 5.5 (-0.3 to 13.2)  | 5.7 (2.0 to 10.5)  |
| Dominican Republic               | 3.0 (-1.7 to 8.6)  | 4.1 (1.6 to 7.0)  | 9.8 (-3.4 to 29.1)  | 9.5 (-0.3 to 22.7)  | 9.8 (3.2 to 17.8)  |
| Ecuador                          | 2.1 (-1.2 to 5.9)  | 2.9 (1.1 to 5.0)  | 7.1 (-2.5 to 21.5)  | 6.8 (-0.2 to 16.4)  | 7.1 (2.3 to 13.0)  |
| Egypt                            | 2.4 (-1.3 to 6.8)  | 3.3 (1.3 to 5.6)  | 8.0 (-2.9 to 23.6)  | 7.7 (-0.3 to 18.6)  | 8.0 (2.6 to 14.7)  |
| Eritrea                          | 1.8 (-1.0 to 4.9)  | 2.4 (1.0 to 4.0)  | 5.9 (-2.2 to 17.2)  | 5.7 (-0.2 to 13.5)  | 5.9 (2.0 to 10.7)  |
| Estonia                          | 2.5 (-1.4 to 7.0)  | 3.4 (1.3 to 5.7)  | 8.2 (-2.7 to 24.4)  | 8.0 (-0.3 to 19.0)  | 8.2 (2.7 to 15.2)  |
| Ethiopia                         | 1.2 (-0.7 to 3.3)  | 1.6 (0.7 to 2.7)  | 4.0 (-1.3 to 11.8)  | 3.9 (-0.2 to 9.1)   | 4.0 (1.3 to 7.3)   |
| Fiji                             | 1.4 (-0.8 to 3.9)  | 1.9 (0.7 to 3.3)  | 4.7 (-1.5 to 13.7)  | 4.5 (-0.2 to 10.7)  | 4.7 (1.5 to 8.6)   |
| Finland                          | 1.3 (-0.8 to 3.8)  | 1.8 (0.7 to 3.0)  | 4.4 (-1.4 to 13.3)  | 4.3 (-0.2 to 10.3)  | 4.4 (1.5 to 8.1)   |
| France                           | 2.3 (-1.3 to 6.5)  | 3.1 (1.2 to 5.2)  | 7.6 (-2.6 to 22.7)  | 7.3 (-0.4 to 17.5)  | 7.6 (2.4 to 13.7)  |
| French Polynesia                 | 1.4 (-0.8 to 4.1)  | 1.9 (0.7 to 3.4)  | 4.8 (-1.7 to 14.1)  | 4.6 (-0.3 to 11.1)  | 4.8 (1.5 to 8.8)   |
| Gabon                            | 2.0 (-1.1 to 5.6)  | 2.7 (1.1 to 4.7)  | 6.6 (-2.4 to 19.7)  | 6.4 (-0.1 to 15.5)  | 6.6 (2.0 to 12.3)  |
| Gambia                           | 1.7 (-1.0 to 4.8)  | 2.3 (0.9 to 3.9)  | 5.6 (-1.8 to 16.5)  | 5.4 (-0.3 to 12.8)  | 5.6 (1.9 to 10.2)  |
| Georgia                          | 1.4 (-0.8 to 4.1)  | 1.9 (0.8 to 3.4)  | 4.8 (-1.6 to 14.3)  | 4.6 (-0.2 to 11.3)  | 4.8 (1.5 to 9.0)   |
| Germany                          | 3.3 (-1.9 to 9.1)  | 4.4 (1.8 to 7.3)  | 10.6 (-3.8 to 31.3) | 10.2 (-0.6 to 24.4) | 10.6 (3.4 to 19.1) |
| Ghana                            | 1.7 (-1.1 to 4.8)  | 2.3 (0.9 to 3.9)  | 5.8 (-1.9 to 16.9)  | 5.6 (-0.1 to 13.1)  | 5.8 (1.9 to 10.4)  |
| Greece                           | 2.9 (-1.8 to 8.4)  | 4.0 (1.6 to 6.6)  | 9.6 (-3.5 to 28.3)  | 9.2 (-0.6 to 22.0)  | 9.6 (3.2 to 17.2)  |
| Grenada                          | 2.2 (-1.3 to 6.4)  | 3.1 (1.2 to 5.2)  | 7.4 (-2.6 to 22.5)  | 7.2 (-0.3 to 17.5)  | 7.4 (2.4 to 13.9)  |
| Guatemala                        | 2.9 (-1.7 to 8.1)  | 3.9 (1.6 to 6.7)  | 9.4 (-3.3 to 28.4)  | 9.1 (-0.4 to 21.9)  | 9.4 (3.1 to 17.5)  |
| Guinea                           | 1.2 (-0.7 to 3.3)  | 1.6 (0.6 to 2.7)  | 3.9 (-1.4 to 11.3)  | 3.8 (-0.1 to 8.9)   | 3.9 (1.2 to 7.3)   |
| Hungary                          | 3.0 (-1.7 to 8.4)  | 4.1 (1.6 to 6.8)  | 9.7 (-3.4 to 29.0)  | 9.4 (-0.3 to 22.2)  | 9.7 (3.2 to 17.5)  |
| India                            | 2.7 (-1.6 to 7.7)  | 3.6 (1.3 to 6.3)  | 8.7 (-2.9 to 26.8)  | 8.4 (-0.3 to 20.5)  | 8.7 (2.7 to 16.6)  |
| Indonesia                        | 1.8 (-0.9 to 5.1)  | 2.4 (0.9 to 4.2)  | 6.0 (-2.1 to 17.7)  | 5.8 (-0.3 to 13.8)  | 6.0 (1.9 to 11.1)  |
| Iran (Islamic Republic of)       | 2.6 (-1.4 to 7.3)  | 3.5 (1.4 to 6.0)  | 8.5 (-2.9 to 25.2)  | 8.2 (-0.6 to 19.6)  | 8.5 (2.8 to 15.7)  |
| Iraq                             | 4.0 (-2.2 to 11.2) | 5.4 (2.2 to 9.0)  | 12.7 (-4.1 to 38.2) | 12.3 (-0.8 to 29.1) | 12.7 (4.3 to 23.0) |
| Ireland                          | 2.6 (-1.5 to 7.2)  | 3.5 (1.4 to 5.8)  | 8.4 (-2.8 to 24.8)  | 8.1 (-0.1 to 19.3)  | 8.4 (2.7 to 15.1)  |
| Italy                            | 3.2 (-1.7 to 9.2)  | 4.4 (1.7 to 7.2)  | 10.4 (-3.7 to 31.1) | 10.1 (-0.4 to 23.8) | 10.4 (3.5 to 18.9) |
| Jamaica                          | 2.5 (-1.5 to 7.1)  | 3.5 (1.4 to 5.8)  | 8.4 (-2.9 to 25.0)  | 8.1 (-0.3 to 19.4)  | 8.4 (2.7 to 15.3)  |
| Japan                            | 2.8 (-1.6 to 8.0)  | 3.8 (1.3 to 6.9)  | 9.0 (-2.9 to 27.4)  | 8.8 (-0.2 to 22.3)  | 9.0 (2.7 to 17.6)  |
| Jordan                           | 0.9 (-0.5 to 2.7)  | 1.3 (0.5 to 2.3)  | 3.2 (-1.2 to 9.7)   | 3.1 (-0.1 to 7.5)   | 3.2 (1.0 to 6.0)   |
| Kazakhstan                       | 2.2 (-1.2 to 6.1)  | 2.9 (1.1 to 5.0)  | 7.2 (-2.3 to 21.2)  | 6.9 (-0.2 to 16.8)  | 7.2 (2.3 to 13.4)  |
| Kenya                            | 1.2 (-0.7 to 3.4)  | 1.7 (0.7 to 2.8)  | 4.1 (-1.4 to 12.2)  | 4.0 (-0.2 to 9.4)   | 4.1 (1.4 to 7.5)   |
| Kiribati                         | 3.1 (-1.9 to 9.0)  | 4.3 (1.7 to 7.2)  | 10.2 (-3.3 to 31.1) | 9.8 (-0.2 to 23.7)  | 10.2 (3.2 to 18.5) |
| Kuwait                           | 5.1 (-3.0 to 14.3) | 6.9 (2.9 to 11.4) | 15.8 (-5.4 to 47.9) | 15.3 (-0.5 to 37.0) | 15.8 (5.3 to 28.8) |
| Kyrgyzstan                       | 1.1 (-0.6 to 3.2)  | 1.5 (0.6 to 2.7)  | 3.8 (-1.3 to 11.3)  | 3.6 (-0.2 to 8.8)   | 3.8 (1.2 to 7.1)   |
| Lao People's Democratic Republic | 1.3 (-0.8 to 3.6)  | 1.8 (0.7 to 3.0)  | 4.4 (-1.5 to 13.0)  | 4.2 (-0.2 to 10.2)  | 4.4 (1.4 to 7.9)   |
| Latvia                           | 2.3 (-1.3 to 6.5)  | 3.1 (1.2 to 5.3)  | 7.6 (-2.6 to 23.0)  | 7.4 (-0.2 to 17.5)  | 7.6 (2.6 to 13.9)  |
| Lebanon                          | 2.8 (-1.5 to 8.1)  | 3.9 (1.5 to 6.5)  | 9.3 (-3.1 to 27.7)  | 9.0 (-0.4 to 21.3)  | 9.3 (3.0 to 16.9)  |

|                                  |                   |                  |                     |                     |                    |
|----------------------------------|-------------------|------------------|---------------------|---------------------|--------------------|
| Lesotho                          | 0.5 (-0.3 to 1.4) | 0.7 (0.3 to 1.2) | 1.7 (-0.6 to 5.2)   | 1.7 (-0.1 to 4.0)   | 1.7 (0.6 to 3.2)   |
| Liberia                          | 2.0 (-1.1 to 5.5) | 2.7 (1.1 to 4.5) | 6.6 (-2.3 to 19.3)  | 6.4 (-0.3 to 15.2)  | 6.6 (2.1 to 12.0)  |
| Libya                            | 2.8 (-1.7 to 8.1) | 3.9 (1.5 to 6.5) | 9.3 (-3.2 to 27.5)  | 9.0 (-0.4 to 21.6)  | 9.3 (2.9 to 17.1)  |
| Lithuania                        | 2.1 (-1.2 to 5.8) | 2.8 (1.1 to 4.8) | 6.9 (-2.3 to 19.9)  | 6.7 (-0.3 to 15.9)  | 6.9 (2.3 to 12.7)  |
| Luxembourg                       | 2.2 (-1.2 to 6.2) | 3.0 (1.2 to 5.1) | 7.4 (-2.6 to 21.5)  | 7.1 (-0.3 to 16.9)  | 7.4 (2.4 to 13.3)  |
| Madagascar                       | 1.4 (-0.8 to 3.8) | 1.9 (0.7 to 3.1) | 4.6 (-1.5 to 13.7)  | 4.4 (-0.2 to 10.6)  | 4.6 (1.5 to 8.4)   |
| Malawi                           | 1.2 (-0.7 to 3.4) | 1.7 (0.7 to 2.8) | 4.2 (-1.5 to 12.2)  | 4.0 (-0.1 to 9.6)   | 4.2 (1.4 to 7.6)   |
| Malaysia                         | 3.0 (-1.7 to 8.6) | 4.1 (1.6 to 6.9) | 9.8 (-3.3 to 29.2)  | 9.5 (-0.4 to 22.5)  | 9.8 (3.3 to 18.2)  |
| Maldives                         | 2.4 (-1.3 to 6.8) | 3.2 (1.3 to 5.5) | 7.8 (-2.6 to 23.6)  | 7.6 (-0.3 to 18.2)  | 7.8 (2.6 to 14.5)  |
| Mali                             | 3.1 (-1.8 to 8.8) | 4.3 (1.7 to 7.0) | 10.2 (-3.4 to 30.0) | 9.8 (-0.2 to 23.4)  | 10.2 (3.3 to 18.6) |
| Malta                            | 3.2 (-1.9 to 9.0) | 4.4 (1.8 to 7.3) | 10.5 (-3.7 to 30.7) | 10.1 (-0.3 to 24.1) | 10.5 (3.4 to 19.2) |
| Marshall Islands                 | 3.4 (-1.9 to 9.5) | 4.6 (1.8 to 7.8) | 10.9 (-3.5 to 32.6) | 10.5 (-0.2 to 25.3) | 10.9 (3.6 to 20.0) |
| Mauritania                       | 3.2 (-1.9 to 8.9) | 4.4 (1.8 to 7.2) | 10.4 (-3.6 to 31.1) | 10.0 (-0.6 to 23.8) | 10.4 (3.5 to 18.7) |
| Mauritius                        | 2.3 (-1.3 to 6.6) | 3.2 (1.2 to 5.3) | 7.7 (-2.8 to 22.7)  | 7.5 (-0.3 to 18.0)  | 7.7 (2.6 to 14.3)  |
| Mexico                           | 2.3 (-1.2 to 6.3) | 3.1 (1.2 to 5.2) | 7.5 (-2.5 to 22.0)  | 7.2 (-0.3 to 17.5)  | 7.5 (2.4 to 13.6)  |
| Micronesia (Federated States of) | 2.8 (-1.6 to 8.0) | 3.9 (1.6 to 6.5) | 9.3 (-3.3 to 27.5)  | 9.0 (-0.4 to 21.6)  | 9.3 (3.0 to 17.0)  |
| Mongolia                         | 1.5 (-0.9 to 4.2) | 2.0 (0.8 to 3.4) | 5.0 (-1.7 to 14.6)  | 4.8 (-0.2 to 11.4)  | 5.0 (1.6 to 9.3)   |
| Morocco                          | 2.1 (-1.1 to 5.8) | 2.8 (1.1 to 4.9) | 6.8 (-2.5 to 20.8)  | 6.6 (-0.3 to 15.9)  | 6.8 (2.2 to 12.7)  |
| Mozambique                       | 0.5 (-0.3 to 1.3) | 0.6 (0.2 to 1.1) | 1.5 (-0.5 to 4.7)   | 1.5 (-0.1 to 3.6)   | 1.5 (0.5 to 2.9)   |
| Myanmar                          | 0.9 (-0.5 to 2.4) | 1.2 (0.5 to 2.0) | 2.9 (-1.0 to 8.7)   | 2.8 (-0.1 to 6.9)   | 2.9 (0.9 to 5.4)   |
| Namibia                          | 2.6 (-1.5 to 7.3) | 3.5 (1.4 to 6.0) | 8.6 (-3.0 to 25.1)  | 8.3 (-0.5 to 19.4)  | 8.6 (2.7 to 15.6)  |
| Nauru                            | 3.3 (-1.8 to 9.3) | 4.4 (1.8 to 7.6) | 10.5 (-3.5 to 31.2) | 10.2 (-0.6 to 24.5) | 10.5 (3.4 to 19.4) |
| Nepal                            | 1.1 (-0.6 to 3.0) | 1.5 (0.6 to 2.4) | 3.6 (-1.3 to 10.7)  | 3.5 (-0.1 to 8.3)   | 3.6 (1.2 to 6.6)   |
| Netherlands                      | 2.1 (-1.2 to 6.0) | 2.9 (1.2 to 4.9) | 7.1 (-2.5 to 20.9)  | 6.8 (-0.4 to 16.2)  | 7.1 (2.3 to 13.1)  |
| New Zealand                      | 3.3 (-2.0 to 9.3) | 4.5 (1.9 to 7.4) | 10.6 (-3.5 to 31.6) | 10.3 (-0.5 to 24.7) | 10.6 (3.5 to 19.2) |
| Niger                            | 1.8 (-1.0 to 5.1) | 2.4 (0.9 to 4.1) | 5.9 (-2.1 to 17.9)  | 5.7 (-0.2 to 13.9)  | 5.9 (2.0 to 11.0)  |
| Nigeria                          | 2.1 (-1.2 to 5.9) | 2.9 (1.2 to 4.9) | 7.1 (-2.5 to 21.2)  | 6.8 (-0.2 to 16.2)  | 7.1 (2.4 to 12.8)  |
| Niue                             | 0.6 (-0.3 to 1.6) | 0.8 (0.3 to 1.3) | 1.9 (-0.7 to 5.7)   | 1.8 (-0.1 to 4.4)   | 1.9 (0.6 to 3.6)   |
| Norway                           | 2.5 (-1.3 to 7.0) | 3.4 (1.4 to 5.6) | 8.2 (-2.8 to 24.4)  | 7.9 (-0.3 to 18.6)  | 8.2 (2.8 to 14.9)  |
| Oman                             | 2.6 (-1.4 to 7.2) | 3.5 (1.4 to 5.9) | 8.4 (-3.0 to 25.4)  | 8.2 (-0.2 to 19.5)  | 8.4 (2.8 to 15.6)  |
| Pakistan                         | 2.6 (-1.5 to 7.6) | 3.6 (1.3 to 6.2) | 8.6 (-2.9 to 26.6)  | 8.3 (-0.5 to 20.0)  | 8.6 (2.8 to 16.6)  |
| Palau                            | 3.2 (-1.8 to 9.1) | 4.3 (1.7 to 7.3) | 10.3 (-3.8 to 31.3) | 9.9 (-0.4 to 24.0)  | 10.3 (3.3 to 18.7) |
| Papua New Guinea                 | 1.2 (-0.7 to 3.4) | 1.6 (0.6 to 2.9) | 4.0 (-1.4 to 11.9)  | 3.8 (-0.1 to 9.4)   | 4.0 (1.2 to 7.6)   |
| Paraguay                         | 2.9 (-1.7 to 8.1) | 4.0 (1.6 to 6.7) | 9.5 (-3.0 to 28.4)  | 9.2 (-0.5 to 22.0)  | 9.5 (3.1 to 17.2)  |
| Philippines                      | 3.1 (-1.8 to 8.7) | 4.2 (1.6 to 7.0) | 10.0 (-3.6 to 29.4) | 9.7 (-0.4 to 23.0)  | 10.0 (3.4 to 18.2) |
| Poland                           | 2.5 (-1.5 to 7.1) | 3.5 (1.4 to 5.8) | 8.3 (-2.9 to 24.6)  | 8.1 (-0.3 to 19.3)  | 8.3 (2.8 to 15.3)  |
| Portugal                         | 3.4 (-1.9 to 9.5) | 4.6 (1.9 to 7.6) | 10.8 (-4.0 to 31.8) | 10.5 (-0.3 to 25.2) | 10.8 (3.7 to 19.8) |
| Qatar                            | 2.9 (-1.6 to 8.2) | 3.9 (1.5 to 6.6) | 9.3 (-3.4 to 27.5)  | 9.0 (-0.5 to 21.7)  | 9.3 (3.0 to 17.1)  |
| Republic of Korea                | 2.8 (-1.6 to 8.1) | 3.8 (1.3 to 6.8) | 9.0 (-3.1 to 28.8)  | 8.7 (-0.2 to 21.7)  | 9.0 (2.6 to 17.7)  |
| Republic of Moldova              | 0.9 (-0.5 to 2.6) | 1.3 (0.5 to 2.2) | 3.1 (-1.1 to 9.6)   | 3.0 (-0.1 to 7.2)   | 3.1 (1.0 to 5.8)   |
| Romania                          | 2.8 (-1.5 to 7.8) | 3.8 (1.5 to 6.3) | 9.0 (-3.2 to 27.5)  | 8.7 (-0.5 to 20.9)  | 9.0 (3.0 to 16.7)  |
| Russian Federation               | 1.4 (-0.8 to 3.8) | 1.9 (0.7 to 3.2) | 4.6 (-1.6 to 13.6)  | 4.4 (-0.1 to 10.7)  | 4.6 (1.5 to 8.3)   |
| Rwanda                           | 1.2 (-0.7 to 3.2) | 1.6 (0.6 to 2.7) | 3.9 (-1.4 to 11.8)  | 3.8 (-0.1 to 9.1)   | 3.9 (1.3 to 7.3)   |



|                                    |                    |                  |                     |                     |                    |
|------------------------------------|--------------------|------------------|---------------------|---------------------|--------------------|
| Saint Kitts & Nevis                | 2.5 (-1.4 to 7.1)  | 3.4 (1.3 to 5.8) | 8.3 (-2.9 to 25.0)  | 8.0 (-0.3 to 19.0)  | 8.3 (2.7 to 15.4)  |
| Saint Lucia                        | 3.1 (-1.7 to 8.7)  | 4.2 (1.7 to 7.1) | 10.0 (-3.4 to 30.0) | 9.7 (-0.5 to 23.3)  | 10.0 (3.3 to 18.3) |
| Samoa                              | 1.0 (-0.6 to 2.9)  | 1.4 (0.5 to 2.4) | 3.4 (-1.2 to 10.2)  | 3.3 (-0.2 to 8.0)   | 3.4 (1.1 to 6.4)   |
| Sao Tome & Principe                | 1.2 (-0.7 to 3.6)  | 1.7 (0.6 to 2.9) | 4.2 (-1.5 to 12.4)  | 4.0 (-0.1 to 9.7)   | 4.2 (1.4 to 7.6)   |
| Saudi Arabia                       | 4.1 (-2.3 to 11.4) | 5.5 (2.2 to 9.1) | 12.9 (-4.8 to 38.2) | 12.5 (-0.7 to 30.2) | 12.9 (4.4 to 23.1) |
| Senegal                            | 1.8 (-1.1 to 5.1)  | 2.5 (1.0 to 4.1) | 6.1 (-2.1 to 17.7)  | 5.9 (-0.3 to 13.9)  | 6.1 (1.9 to 11.0)  |
| Serbia                             | 3.1 (-1.7 to 8.7)  | 4.2 (1.7 to 7.0) | 10.0 (-3.4 to 29.7) | 9.6 (-0.3 to 23.0)  | 10.0 (3.2 to 18.3) |
| Seychelles                         | 1.5 (-0.8 to 4.2)  | 2.0 (0.8 to 3.5) | 5.0 (-1.8 to 15.1)  | 4.8 (-0.2 to 11.8)  | 5.0 (1.6 to 9.2)   |
| Sierra Leone                       | 1.1 (-0.7 to 3.2)  | 1.6 (0.6 to 2.6) | 3.9 (-1.4 to 11.3)  | 3.7 (-0.1 to 8.8)   | 3.9 (1.3 to 7.2)   |
| Singapore                          | 2.8 (-1.6 to 8.3)  | 3.9 (1.4 to 7.0) | 9.3 (-3.3 to 28.8)  | 9.0 (-0.5 to 22.2)  | 9.3 (2.8 to 18.1)  |
| Slovakia                           | 2.7 (-1.6 to 7.6)  | 3.7 (1.5 to 6.2) | 8.9 (-2.9 to 26.2)  | 8.6 (-0.4 to 20.5)  | 8.9 (2.9 to 16.3)  |
| Slovenia                           | 2.5 (-1.5 to 7.2)  | 3.4 (1.3 to 5.7) | 8.3 (-2.9 to 24.2)  | 8.0 (-0.3 to 19.4)  | 8.3 (2.7 to 15.1)  |
| Solomon Islands                    | 1.4 (-0.8 to 4.2)  | 2.0 (0.8 to 3.4) | 4.9 (-1.8 to 14.5)  | 4.7 (-0.2 to 11.4)  | 4.9 (1.6 to 9.1)   |
| South Africa                       | 3.0 (-1.6 to 8.4)  | 4.0 (1.6 to 6.7) | 9.7 (-3.2 to 28.9)  | 9.4 (-0.5 to 22.4)  | 9.7 (3.2 to 17.7)  |
| Spain                              | 2.1 (-1.2 to 5.9)  | 2.9 (1.2 to 4.8) | 7.0 (-2.3 to 20.6)  | 6.8 (-0.3 to 16.2)  | 7.0 (2.3 to 12.8)  |
| Sri Lanka                          | 2.3 (-1.2 to 6.5)  | 3.1 (1.2 to 5.3) | 7.5 (-2.5 to 22.5)  | 7.2 (-0.4 to 17.3)  | 7.5 (2.4 to 13.7)  |
| State of Palestine                 | 3.1 (-1.7 to 8.9)  | 4.3 (1.7 to 7.1) | 10.2 (-3.5 to 30.3) | 9.9 (-0.5 to 23.7)  | 10.2 (3.3 to 18.7) |
| Suriname                           | 3.4 (-2.0 to 9.9)  | 4.7 (1.9 to 7.8) | 11.1 (-3.9 to 32.8) | 10.7 (-0.3 to 25.5) | 11.1 (3.6 to 20.0) |
| Swaziland                          | 2.2 (-1.3 to 6.3)  | 3.0 (1.2 to 5.0) | 7.3 (-2.6 to 21.1)  | 7.0 (-0.3 to 16.7)  | 7.3 (2.5 to 13.3)  |
| Sweden                             | 1.8 (-1.1 to 5.1)  | 2.5 (1.0 to 4.2) | 6.1 (-2.1 to 18.6)  | 5.9 (-0.4 to 14.1)  | 6.1 (1.9 to 11.0)  |
| Switzerland                        | 1.9 (-1.1 to 5.4)  | 2.5 (1.0 to 4.3) | 6.2 (-2.0 to 18.2)  | 6.0 (-0.3 to 14.2)  | 6.2 (2.0 to 11.4)  |
| Tajikistan                         | 2.3 (-1.3 to 6.4)  | 3.1 (1.2 to 5.4) | 7.6 (-2.6 to 22.9)  | 7.3 (-0.3 to 17.9)  | 7.6 (2.4 to 14.2)  |
| Thailand                           | 1.9 (-1.1 to 5.6)  | 2.6 (1.0 to 4.5) | 6.4 (-2.2 to 18.9)  | 6.2 (-0.2 to 15.1)  | 6.4 (2.1 to 12.0)  |
| Timor-Leste                        | 1.4 (-0.8 to 4.1)  | 1.9 (0.7 to 3.4) | 4.8 (-1.7 to 14.4)  | 4.6 (-0.3 to 11.2)  | 4.8 (1.5 to 9.0)   |
| Togo                               | 0.8 (-0.4 to 2.2)  | 1.1 (0.4 to 1.8) | 2.7 (-0.9 to 7.8)   | 2.6 (-0.1 to 6.2)   | 2.7 (0.9 to 4.9)   |
| Tokelau                            | 0.9 (-0.5 to 2.6)  | 1.2 (0.5 to 2.1) | 3.0 (-1.0 to 9.1)   | 2.9 (-0.1 to 7.2)   | 3.0 (1.0 to 5.7)   |
| Tonga                              | 1.4 (-0.7 to 4.0)  | 1.9 (0.7 to 3.2) | 4.7 (-1.6 to 14.1)  | 4.5 (-0.2 to 10.7)  | 4.7 (1.5 to 8.8)   |
| Trinidad and Tobago                | 3.0 (-1.7 to 8.4)  | 4.0 (1.6 to 7.0) | 9.7 (-3.5 to 28.5)  | 9.4 (-0.1 to 22.3)  | 9.7 (3.0 to 17.8)  |
| Tunisia                            | 2.4 (-1.4 to 6.8)  | 3.2 (1.2 to 5.4) | 7.8 (-2.8 to 23.2)  | 7.6 (-0.4 to 18.1)  | 7.8 (2.5 to 14.3)  |
| Turkey                             | 2.4 (-1.4 to 6.8)  | 3.3 (1.3 to 5.6) | 7.9 (-2.8 to 23.2)  | 7.6 (-0.5 to 17.9)  | 7.9 (2.5 to 14.6)  |
| Tuvalu                             | 2.1 (-1.2 to 6.0)  | 2.9 (1.2 to 5.0) | 7.1 (-2.4 to 21.2)  | 6.9 (-0.3 to 16.5)  | 7.1 (2.3 to 13.1)  |
| Uganda                             | 0.4 (-0.3 to 1.3)  | 0.6 (0.2 to 1.0) | 1.5 (-0.5 to 4.4)   | 1.5 (-0.1 to 3.5)   | 1.5 (0.5 to 2.8)   |
| Ukraine                            | 1.5 (-0.9 to 4.4)  | 2.1 (0.8 to 3.6) | 5.2 (-1.7 to 15.4)  | 5.0 (-0.2 to 11.9)  | 5.2 (1.7 to 9.7)   |
| United Arab Emirates               | 3.2 (-1.8 to 9.1)  | 4.4 (1.7 to 7.3) | 10.4 (-3.5 to 30.7) | 10.1 (-0.4 to 23.9) | 10.4 (3.4 to 19.2) |
| United Kingdom                     | 2.8 (-1.6 to 7.9)  | 3.8 (1.5 to 6.3) | 9.1 (-3.4 to 27.0)  | 8.8 (-0.4 to 20.9)  | 9.1 (3.0 to 16.4)  |
| United Republic of Tanzania        | 0.5 (-0.3 to 1.4)  | 0.7 (0.3 to 1.2) | 1.8 (-0.6 to 5.4)   | 1.7 (-0.1 to 4.1)   | 1.8 (0.6 to 3.3)   |
| United States of America           | 3.1 (-1.9 to 8.8)  | 4.2 (1.7 to 7.1) | 10.1 (-3.6 to 30.1) | 9.8 (-0.5 to 23.3)  | 10.1 (3.4 to 18.3) |
| Uruguay                            | 1.8 (-1.1 to 5.0)  | 2.4 (1.0 to 4.1) | 5.9 (-2.2 to 17.9)  | 5.7 (-0.2 to 13.6)  | 5.9 (1.9 to 10.8)  |
| Uzbekistan                         | 1.5 (-0.8 to 4.3)  | 2.1 (0.8 to 3.6) | 5.1 (-1.8 to 15.3)  | 4.9 (-0.2 to 11.8)  | 5.1 (1.6 to 9.5)   |
| Vanuatu                            | 0.6 (-0.4 to 1.9)  | 0.9 (0.3 to 1.5) | 2.2 (-0.7 to 6.6)   | 2.1 (-0.1 to 5.2)   | 2.2 (0.7 to 4.2)   |
| Venezuela (Bolivarian Republic of) | 2.5 (-1.3 to 7.1)  | 3.3 (1.4 to 5.7) | 8.1 (-2.8 to 23.7)  | 7.8 (-0.3 to 18.9)  | 8.1 (2.7 to 14.2)  |
| Viet Nam                           | 2.0 (-1.1 to 5.7)  | 2.7 (1.1 to 4.6) | 6.6 (-2.4 to 19.7)  | 6.4 (0.0 to 15.2)   | 6.6 (2.2 to 12.3)  |
| Zambia                             | 1.7 (-1.0 to 4.9)  | 2.4 (0.9 to 4.0) | 5.8 (-2.2 to 17.2)  | 5.6 (-0.3 to 13.5)  | 5.8 (1.9 to 10.3)  |

|          |                   |                  |                    |                    |                    |
|----------|-------------------|------------------|--------------------|--------------------|--------------------|
| Zimbabwe | 2.1 (-1.2 to 5.9) | 2.9 (1.1 to 4.8) | 7.0 (-2.6 to 20.7) | 6.8 (-0.4 to 16.2) | 7.0 (2.3 to 12.81) |
|----------|-------------------|------------------|--------------------|--------------------|--------------------|

**Supplementary Table 3. Population Attributable Risks for Physical Inactivity and Female Cancer Outcomes by Country**

| <b>Country</b>           | <b>Breast Cancer</b> | <b>Endometrial Cancer</b> |
|--------------------------|----------------------|---------------------------|
| Algeria                  | 3.5 (1.5 to 5.7)     | 3.5 (-0.6 to 8.1)         |
| American Samoa           | 4.9 (2.2 to 8.0)     | 4.9 (-0.9 to 11.3)        |
| Andorra                  | 3.5 (1.6 to 5.6)     | 3.5 (-0.6 to 8.0)         |
| Argentina                | 3.9 (1.8 to 6.4)     | 3.9 (-0.7 to 9.0)         |
| Armenia                  | 2.0 (0.8 to 3.3)     | 2.0 (-0.3 to 4.5)         |
| Australia                | 2.9 (1.3 to 4.8)     | 2.9 (-0.5 to 6.7)         |
| Austria                  | 2.9 (1.3 to 4.7)     | 2.9 (-0.5 to 6.7)         |
| Bahamas                  | 4.8 (2.1 to 7.6)     | 4.8 (-0.7 to 11.0)        |
| Bangladesh               | 3.4 (1.4 to 5.9)     | 3.4 (-0.6 to 8.3)         |
| Barbados                 | 4.7 (2.1 to 7.6)     | 4.7 (-0.9 to 10.9)        |
| Belarus                  | 1.3 (0.5 to 2.2)     | 1.3 (-0.2 to 3.1)         |
| Belgium                  | 3.5 (1.6 to 5.7)     | 3.5 (-0.5 to 8.2)         |
| Benin                    | 1.6 (0.7 to 2.6)     | 1.6 (-0.3 to 3.7)         |
| Bermuda                  | 2.8 (1.2 to 4.6)     | 2.8 (-0.4 to 6.6)         |
| Bhutan                   | 2.6 (1.1 to 4.2)     | 2.6 (-0.5 to 6.1)         |
| Bosnia & Herzegovina     | 2.5 (1.0 to 4.1)     | 2.5 (-0.3 to 5.8)         |
| Botswana                 | 2.3 (1.0 to 3.8)     | 2.3 (-0.4 to 5.4)         |
| Brazil                   | 4.6 (2.0 to 7.4)     | 4.6 (-0.7 to 10.6)        |
| British Virgin Islands   | 3.1 (1.4 to 5.1)     | 3.1 (-0.6 to 7.3)         |
| Brunei Darussalam        | 3.0 (1.2 to 5.0)     | 3.0 (-0.4 to 6.9)         |
| Bulgaria                 | 3.6 (1.6 to 5.9)     | 3.6 (-0.6 to 8.3)         |
| Burkina Faso             | 2.0 (0.9 to 3.3)     | 2.0 (-0.3 to 4.7)         |
| Cabo Verde               | 2.2 (1.0 to 3.6)     | 2.2 (-0.3 to 5.1)         |
| Cambodia                 | 1.0 (0.4 to 1.7)     | 1.0 (-0.1 to 2.4)         |
| Cameroon                 | 3.1 (1.4 to 5.0)     | 3.1 (-0.6 to 7.2)         |
| Canada                   | 2.8 (1.2 to 4.5)     | 2.8 (-0.4 to 6.5)         |
| Cayman Islands           | 3.3 (1.5 to 5.4)     | 3.3 (-0.5 to 7.7)         |
| Central African Republic | 1.4 (0.6 to 2.3)     | 1.4 (-0.2 to 3.3)         |
| Chad                     | 2.4 (1.0 to 3.9)     | 2.4 (-0.4 to 5.5)         |
| Chile                    | 2.5 (1.1 to 4.1)     | 2.5 (-0.4 to 5.9)         |
| China                    | 1.1 (0.5 to 1.8)     | 1.1 (-0.2 to 2.6)         |
| Colombia                 | 4.2 (1.9 to 6.8)     | 4.2 (-0.6 to 9.6)         |
| Comoros                  | 1.7 (0.7 to 2.8)     | 1.7 (-0.3 to 4.0)         |
| Congo                    | 2.7 (1.2 to 4.5)     | 2.7 (-0.4 to 6.5)         |
| Cook Islands             | 2.4 (1.0 to 4.0)     | 2.4 (-0.4 to 5.7)         |
| Costa Rica               | 4.7 (2.1 to 7.5)     | 4.7 (-0.7 to 10.8)        |
| Cote d'Ivoire            | 3.3 (1.5 to 5.2)     | 3.3 (-0.5 to 7.5)         |
| Croatia                  | 3.1 (1.4 to 5.1)     | 3.1 (-0.5 to 7.3)         |
| Cuba                     | 3.7 (1.6 to 6.0)     | 3.7 (-0.6 to 8.5)         |
| Cyprus                   | 4.4 (1.9 to 7.0)     | 4.4 (-0.7 to 10.1)        |

|                                  |                   |                    |
|----------------------------------|-------------------|--------------------|
| Czech Republic                   | 3.0 (1.3 to 4.8)  | 3.0 (-0.5 to 7.0)  |
| Democratic Republic of the Congo | 2.4 (1.0 to 3.8)  | 2.4 (-0.4 to 5.4)  |
| Denmark                          | 2.7 (1.2 to 4.5)  | 2.7 (-0.4 to 6.4)  |
| Dominica                         | 2.6 (1.2 to 4.3)  | 2.6 (-0.4 to 6.1)  |
| Dominican Republic               | 3.8 (1.6 to 6.1)  | 3.8 (-0.6 to 8.7)  |
| Ecuador                          | 2.7 (1.1 to 4.3)  | 2.6 (-0.4 to 6.1)  |
| Egypt                            | 3.4 (1.5 to 5.5)  | 3.4 (-0.6 to 7.9)  |
| Eritrea                          | 2.7 (1.2 to 4.3)  | 2.7 (-0.4 to 6.2)  |
| Estonia                          | 3.0 (1.4 to 5.0)  | 3.0 (-0.5 to 7.0)  |
| Ethiopia                         | 1.6 (0.7 to 2.6)  | 1.6 (-0.3 to 3.8)  |
| Fiji                             | 2.1 (0.9 to 3.5)  | 2.2 (-0.4 to 5.0)  |
| Finland                          | 1.4 (0.6 to 2.3)  | 1.4 (-0.2 to 3.3)  |
| France                           | 3.0 (1.3 to 4.8)  | 3.0 (-0.5 to 6.9)  |
| French Polynesia                 | 2.0 (0.8 to 3.3)  | 2.0 (-0.3 to 4.7)  |
| Gabon                            | 2.9 (1.3 to 4.8)  | 2.9 (-0.5 to 6.8)  |
| Gambia                           | 2.3 (1.0 to 3.8)  | 2.3 (-0.3 to 5.3)  |
| Georgia                          | 1.7 (0.7 to 2.8)  | 1.7 (-0.3 to 3.9)  |
| Germany                          | 3.8 (1.7 to 6.1)  | 3.8 (-0.6 to 8.7)  |
| Ghana                            | 2.2 (1.0 to 3.5)  | 2.2 (-0.4 to 5.1)  |
| Greece                           | 3.6 (1.6 to 5.8)  | 3.6 (-0.5 to 8.3)  |
| Grenada                          | 3.1 (1.4 to 5.1)  | 3.1 (-0.6 to 7.2)  |
| Guatemala                        | 3.2 (1.4 to 5.2)  | 3.2 (-0.5 to 7.6)  |
| Guinea                           | 1.6 (0.7 to 2.7)  | 1.6 (-0.3 to 3.9)  |
| Hungary                          | 3.8 (1.7 to 6.1)  | 3.8 (-0.6 to 8.7)  |
| India                            | 3.8 (1.6 to 6.5)  | 3.8 (-0.5 to 9.2)  |
| Indonesia                        | 1.9 (0.8 to 3.3)  | 1.9 (-0.3 to 4.6)  |
| Iran (Islamic Republic of)       | 3.8 (1.7 to 6.2)  | 3.8 (-0.5 to 8.8)  |
| Iraq                             | 5.5 (2.5 to 8.8)  | 5.5 (-0.8 to 12.7) |
| Ireland                          | 3.2 (1.4 to 5.2)  | 3.2 (-0.4 to 7.5)  |
| Italy                            | 4.0 (1.8 to 6.4)  | 4.0 (-0.5 to 9.3)  |
| Jamaica                          | 3.2 (1.4 to 5.3)  | 3.2 (-0.5 to 7.5)  |
| Japan                            | 3.2 (1.3 to 5.8)  | 3.2 (-0.5 to 8.0)  |
| Jordan                           | 1.2 (0.5 to 2.0)  | 1.2 (-0.2 to 2.8)  |
| Kazakhstan                       | 2.5 (1.1 to 4.2)  | 2.5 (-0.4 to 5.9)  |
| Kenya                            | 1.5 (0.7 to 2.4)  | 1.5 (-0.2 to 3.5)  |
| Kiribati                         | 4.0 (1.7 to 6.4)  | 4.0 (-0.6 to 9.2)  |
| Kuwait                           | 6.3 (2.8 to 10.1) | 6.3 (-1.1 to 14.5) |
| Kyrgyzstan                       | 1.5 (0.6 to 2.6)  | 1.5 (-0.2 to 3.5)  |
| Lao People's Democratic Republic | 1.8 (0.8 to 3.0)  | 1.8 (-0.3 to 4.4)  |
| Latvia                           | 2.9 (1.3 to 4.7)  | 2.9 (-0.4 to 6.7)  |
| Lebanon                          | 2.9 (1.2 to 4.7)  | 2.9 (-0.5 to 6.7)  |
| Lesotho                          | 0.5 (0.2 to 0.9)  | 0.5 (-0.1 to 1.3)  |
| Liberia                          | 2.5 (1.1 to 4.1)  | 2.5 (-0.4 to 5.8)  |

|                                  |                  |                    |
|----------------------------------|------------------|--------------------|
| Libya                            | 3.6 (1.6 to 5.9) | 3.6 (-0.5 to 8.3)  |
| Lithuania                        | 2.6 (1.1 to 4.2) | 2.6 (-0.4 to 6.0)  |
| Luxembourg                       | 2.7 (1.2 to 4.3) | 2.7 (-0.4 to 6.2)  |
| Madagascar                       | 1.9 (0.8 to 3.1) | 1.9 (-0.3 to 4.4)  |
| Malawi                           | 1.6 (0.7 to 2.6) | 1.6 (-0.2 to 3.7)  |
| Malaysia                         | 3.7 (1.7 to 6.1) | 3.7 (-0.7 to 8.7)  |
| Maldives                         | 3.1 (1.3 to 5.1) | 3.0 (-0.5 to 7.2)  |
| Mali                             | 4.1 (1.9 to 6.4) | 4.1 (-0.8 to 9.3)  |
| Malta                            | 4.1 (1.8 to 6.5) | 4.1 (-0.6 to 9.5)  |
| Marshall Islands                 | 4.3 (1.9 to 7.0) | 4.3 (-0.7 to 10.1) |
| Mauritania                       | 4.0 (1.8 to 6.4) | 4.0 (-0.7 to 9.2)  |
| Mauritius                        | 2.8 (1.2 to 4.6) | 2.8 (-0.4 to 6.5)  |
| Mexico                           | 2.8 (1.3 to 4.6) | 2.8 (-0.5 to 6.5)  |
| Micronesia (Federated States of) | 3.5 (1.5 to 5.8) | 3.5 (-0.6 to 8.2)  |
| Mongolia                         | 1.7 (0.8 to 2.8) | 1.7 (-0.2 to 4.1)  |
| Morocco                          | 2.8 (1.2 to 4.6) | 2.8 (-0.5 to 6.5)  |
| Mozambique                       | 0.5 (0.2 to 0.9) | 0.5 (-0.1 to 1.3)  |
| Myanmar                          | 1.2 (0.5 to 2.0) | 1.2 (-0.2 to 2.8)  |
| Namibia                          | 3.3 (1.4 to 5.3) | 3.3 (-0.5 to 7.6)  |
| Nauru                            | 4.3 (1.9 to 6.9) | 4.3 (-0.7 to 10.0) |
| Nepal                            | 1.3 (0.6 to 2.1) | 1.3 (-0.2 to 3.0)  |
| Netherlands                      | 2.5 (1.1 to 4.1) | 2.5 (-0.4 to 5.9)  |
| New Zealand                      | 3.9 (1.7 to 6.3) | 3.9 (-0.7 to 9.0)  |
| Niger                            | 2.2 (1.0 to 3.7) | 2.2 (-0.4 to 5.2)  |
| Nigeria                          | 2.6 (1.1 to 4.2) | 2.6 (-0.5 to 6.1)  |
| Niue                             | 0.5 (0.2 to 0.9) | 0.5 (-0.1 to 1.3)  |
| Norway                           | 3.0 (1.3 to 4.8) | 3.0 (-0.4 to 6.8)  |
| Oman                             | 3.5 (1.5 to 5.7) | 3.5 (-0.6 to 8.1)  |
| Pakistan                         | 3.8 (1.5 to 6.4) | 3.8 (-0.5 to 9.0)  |
| Palau                            | 4.6 (2.0 to 7.5) | 4.6 (-0.6 to 10.7) |
| Papua New Guinea                 | 1.6 (0.6 to 2.8) | 1.6 (-0.2 to 3.9)  |
| Paraguay                         | 3.2 (1.4 to 5.2) | 3.2 (-0.4 to 7.4)  |
| Philippines                      | 4.2 (1.9 to 6.8) | 4.2 (-0.7 to 9.8)  |
| Poland                           | 2.9 (1.3 to 4.8) | 2.9 (-0.5 to 6.8)  |
| Portugal                         | 4.2 (1.9 to 6.8) | 4.2 (-0.7 to 9.6)  |
| Qatar                            | 4.2 (1.9 to 6.8) | 4.2 (-0.7 to 9.8)  |
| Republic of Korea                | 3.6 (1.4 to 6.2) | 3.6 (-0.6 to 8.7)  |
| Republic of Moldova              | 1.0 (0.4 to 1.6) | 1.0 (-0.2 to 2.3)  |
| Romania                          | 3.3 (1.5 to 5.4) | 3.3 (-0.6 to 7.7)  |
| Russian Federation               | 1.6 (0.7 to 2.6) | 1.6 (-0.3 to 3.6)  |
| Rwanda                           | 1.6 (0.7 to 2.6) | 1.6 (-0.3 to 3.6)  |
| Saint Kitts & Nevis              | 3.5 (1.5 to 5.7) | 3.5 (-0.6 to 8.2)  |
| Saint Lucia                      | 4.5 (2.0 to 7.3) | 4.5 (-0.8 to 10.4) |

|                                    |                  |                    |
|------------------------------------|------------------|--------------------|
| Samoa                              | 1.5 (0.6 to 2.6) | 1.5 (-0.2 to 3.7)  |
| Sao Tome & Principe                | 1.9 (0.8 to 3.0) | 1.9 (-0.3 to 4.3)  |
| Saudi Arabia                       | 5.5 (2.5 to 8.8) | 5.5 (-0.9 to 12.7) |
| Senegal                            | 2.5 (1.1 to 4.0) | 2.5 (-0.3 to 5.7)  |
| Serbia                             | 3.8 (1.7 to 6.2) | 3.8 (-0.5 to 8.7)  |
| Seychelles                         | 1.8 (0.8 to 3.0) | 1.8 (-0.3 to 4.3)  |
| Sierra Leone                       | 1.6 (0.7 to 2.7) | 1.6 (-0.3 to 3.8)  |
| Singapore                          | 3.4 (1.3 to 5.8) | 3.4 (-0.5 to 8.3)  |
| Slovakia                           | 3.3 (1.5 to 5.4) | 3.3 (-0.5 to 7.7)  |
| Slovenia                           | 3.2 (1.4 to 5.2) | 3.2 (-0.5 to 7.4)  |
| Solomon Islands                    | 2.1 (0.9 to 3.4) | 2.1 (-0.3 to 4.8)  |
| South Africa                       | 4.1 (1.8 to 6.6) | 4.1 (-0.6 to 9.4)  |
| Spain                              | 2.7 (1.2 to 4.4) | 2.7 (-0.4 to 6.2)  |
| Sri Lanka                          | 3.2 (1.4 to 5.3) | 3.2 (-0.5 to 7.5)  |
| State of Palestine                 | 4.2 (1.9 to 6.8) | 4.2 (-0.6 to 9.7)  |
| Suriname                           | 4.4 (1.9 to 7.0) | 4.4 (-0.7 to 10.1) |
| Swaziland                          | 2.8 (1.2 to 4.6) | 2.8 (-0.5 to 6.5)  |
| Sweden                             | 2.2 (0.9 to 3.6) | 2.2 (-0.3 to 5.0)  |
| Switzerland                        | 2.3 (1.0 to 3.7) | 2.3 (-0.3 to 5.3)  |
| Tajikistan                         | 3.4 (1.5 to 5.6) | 3.4 (-0.7 to 7.9)  |
| Thailand                           | 2.4 (1.0 to 4.0) | 2.4 (-0.4 to 5.7)  |
| Timor-Leste                        | 2.2 (0.9 to 3.8) | 2.2 (-0.3 to 5.3)  |
| Togo                               | 0.9 (0.4 to 1.5) | 0.9 (-0.1 to 2.2)  |
| Tokelau                            | 1.6 (0.6 to 2.7) | 1.6 (-0.2 to 3.7)  |
| Tonga                              | 2.3 (1.0 to 3.8) | 2.3 (-0.4 to 5.4)  |
| Trinidad and Tobago                | 4.2 (1.9 to 6.9) | 4.2 (-0.8 to 9.9)  |
| Tunisia                            | 3.0 (1.3 to 4.9) | 3.0 (-0.5 to 7.0)  |
| Turkey                             | 3.4 (1.5 to 5.5) | 3.4 (-0.6 to 7.9)  |
| Tuvalu                             | 3.2 (1.4 to 5.3) | 3.2 (-0.6 to 7.5)  |
| Uganda                             | 0.5 (0.2 to 0.9) | 0.5 (-0.1 to 1.2)  |
| Ukraine                            | 1.8 (0.8 to 3.0) | 1.8 (-0.3 to 4.2)  |
| United Arab Emirates               | 4.3 (1.9 to 6.8) | 4.3 (-0.6 to 9.9)  |
| United Kingdom                     | 3.5 (1.6 to 5.6) | 3.5 (-0.6 to 8.0)  |
| United Republic of Tanzania        | 0.6 (0.3 to 1.1) | 0.6 (-0.1 to 1.5)  |
| United States of America           | 4.1 (1.9 to 6.6) | 4.1 (-0.6 to 9.6)  |
| Uruguay                            | 2.3 (1.0 to 3.8) | 2.3 (-0.4 to 5.3)  |
| Uzbekistan                         | 2.2 (0.9 to 3.7) | 2.2 (-0.3 to 5.2)  |
| Vanuatu                            | 0.8 (0.3 to 1.3) | 0.8 (-0.1 to 1.9)  |
| Venezuela (Bolivarian Republic of) | 2.9 (1.3 to 4.8) | 2.9 (-0.4 to 6.8)  |
| Viet Nam                           | 2.7 (1.2 to 4.4) | 2.7 (-0.4 to 6.4)  |
| Zambia                             | 2.2 (1.0 to 3.6) | 2.2 (-0.4 to 5.1)  |
| Zimbabwe                           | 2.7 (1.2 to 4.4) | 2.7 (-0.4 to 6.3)  |

**Supplementary Table 4. Population Attributable Risks for Physical Inactivity and Type 2 Diabetes, Dementia and Depression by Country**

| <b>Country</b>           | <b>Type 2 Diabetes</b> | <b>Dementia</b>    | <b>Depression</b>  |
|--------------------------|------------------------|--------------------|--------------------|
| Algeria                  | 5.4 (3.6 to 7.5)       | 9.7 (2.9 to 18.5)  | 8.6 (1.5 to 17.7)  |
| American Samoa           | 8.3 (5.7 to 11.4)      | 14.6 (4.5 to 27.4) | 13.0 (2.2 to 26.7) |
| Andorra                  | 6.1 (4.1 to 8.3)       | 10.9 (3.4 to 20.7) | 9.7 (1.6 to 20.0)  |
| Argentina                | 6.6 (4.4 to 9.0)       | 11.8 (3.6 to 22.1) | 10.4 (1.8 to 21.3) |
| Armenia                  | 3.7 (2.3 to 5.3)       | 6.7 (2.0 to 2.8)   | 6.0 (1.2 to 12.3)  |
| Australia                | 4.9 (3.3 to 6.8)       | 8.9 (2.6 to 16.7)  | 7.8 (1.4 to 16.1)  |
| Austria                  | 4.9 (3.3 to 6.6)       | 8.8 (2.7 to 16.5)  | 7.8 (1.4 to 16.0)  |
| Bahamas                  | 6.9 (4.6 to 9.4)       | 12.2 (3.7 to 23.0) | 10.8 (1.9 to 22.0) |
| Bangladesh               | 4.5 (2.6 to 6.7)       | 8.2 (2.3 to 15.9)  | 7.2 (1.2 to 15.3)  |
| Barbados                 | 6.8 (4.6 to 9.3)       | 12.1 (3.7 to 22.8) | 10.7 (1.9 to 21.7) |
| Belarus                  | 2.3 (1.5 to 3.4)       | 4.3 (1.2 to 8.3)   | 3.8 (0.6 to 7.9)   |
| Belgium                  | 5.7 (4.0 to 7.7)       | 10.3 (2.9 to 19.1) | 9.1 (1.7 to 18.3)  |
| Benin                    | 2.6 (1.7 to 3.7)       | 4.8 (1.4 to 9.1)   | 4.3 (0.8 to 8.7)   |
| Bermuda                  | 4.3 (2.8 to 6.0)       | 7.7 (2.4 to 14.9)  | 6.8 (1.1 to 14.2)  |
| Bhutan                   | 3.8 (2.6 to 5.1)       | 6.9 (2.1 to 12.8)  | 6.1 (1.1 to 12.4)  |
| Bosnia & Herzegovina     | 4.2 (2.6 to 5.9)       | 7.5 (2.2 to 14.4)  | 6.7 (1.2 to 13.9)  |
| Botswana                 | 3.6 (2.4 to 4.9)       | 6.5 (2.0 to 12.1)  | 5.7 (1.0 to 11.8)  |
| Brazil                   | 7.4 (5.1 to 9.9)       | 13.1 (3.9 to 24.7) | 11.6 (2.1 to 23.3) |
| British Virgin Islands   | 4.5 (2.9 to 6.2)       | 8.1 (2.4 to 15.2)  | 7.1 (1.3 to 14.7)  |
| Brunei Darussalam        | 4.4 (2.7 to 6.5)       | 8.0 (2.4 to 15.5)  | 7.1 (1.2 to 15.0)  |
| Bulgaria                 | 6.2 (4.1 to 8.4)       | 11.0 (3.2 to 20.4) | 9.8 (1.8 to 20.1)  |
| Burkina Faso             | 3.3 (2.2 to 4.7)       | 6.1 (1.8 to 11.5)  | 5.4 (0.9 to 11.2)  |
| Cabo Verde               | 3.2 (2.1 to 4.5)       | 5.9 (1.8 to 11.3)  | 5.2 (0.8 to 10.8)  |
| Cambodia                 | 1.8 (1.0 to 2.6)       | 3.3 (0.9 to 6.4)   | 2.9 (0.5 to 6.1)   |
| Cameroon                 | 4.6 (3.1 to 6.3)       | 8.4 (2.6 to 15.5)  | 7.4 (1.3 to 15.1)  |
| Canada                   | 4.6 (3.1 to 6.4)       | 8.4 (2.5 to 15.8)  | 7.4 (1.3 to 15.3)  |
| Cayman Islands           | 4.7(3.1 to 6.6)        | 8.5 (2.6 to 16.3)  | 7.5 (1.2 to 15.5)  |
| Central African Republic | 2.4 (1.6 to 3.3)       | 4.4 (1.3 to 8.2)   | 3.9 (0.7 to 7.9)   |
| Chad                     | 3.8 (2.5 to 5.4)       | 6.9 (2.1 to 13.2)  | 6.1 (1.1 to 12.5)  |
| Chile                    | 4.3 (2.8 to 6.1)       | 7.8 (2.3 to 14.8)  | 6.9 (1.2 to 14.4)  |
| China                    | 2.3 (1.5 to 3.4)       | 4.3 (1.2 to 8.4)   | 3.8 (0.6 to 8.0)   |
| Colombia                 | 7.0 (4.7 to 9.5)       | 12.3 (3.8 to 23.0) | 11.0 (2.2 to 22.6) |
| Comoros                  | 2.4 (1.6 to 3.3)       | 4.4 (1.3 to 8.4)   | 3.9 (0.7 to 7.9)   |
| Congo                    | 4.5 (3.0 to 6.3)       | 8.2 (2.7 to 15.7)  | 7.3 (1.2 to 14.8)  |
| Cook Islands             | 3.1 (1.9 to 4.4)       | 5.6 (1.7 to 10.6)  | 4.9 (0.9 to 10.3)  |
| Costa Rica               | 7.3 (5.0 to 9.8)       | 12.9 (3.8 to 23.8) | 11.4 (1.9 to 23.7) |
| Cote d'Ivoire            | 5.3 (3.6 to 7.2)       | 9.6 (2.8 to 18.1)  | 8.5 (1.6 to 17.4)  |
| Croatia                  | 5.0 (3.3 to 7.0)       | 9.1 (2.7 to 17.1)  | 8.0 (1.4 to 16.6)  |
| Cuba                     | 5.9 (4.0 to 8.1)       | 10.6 (3.2 to 19.6) | 9.4 (1.6 to 19.4)  |

|                                  |                    |                    |                    |
|----------------------------------|--------------------|--------------------|--------------------|
| Cyprus                           | 7.0 (4.8 to 9.5)   | 12.4 (3.8 to 23.1) | 11.1 (2.0 to 22.5) |
| Czech Republic                   | 5.0 (3.4 to 7.0)   | 9.1 (2.6 to 17.1)  | 8.0 (1.5 to 16.4)  |
| Democratic Republic of the Congo | 3.9 (2.6 to 5.3)   | 7.1 (2.1 to 13.2)  | 6.3 (1.0 to 12.7)  |
| Denmark                          | 4.6 (3.1 to 6.4)   | 8.4 (2.6 to 15.5)  | 7.4 (1.3 to 15.1)  |
| Dominica                         | 3.5 (2.3 to 5.0)   | 6.5 (1.9 to 12.4)  | 5.7 (1.0 to 11.8)  |
| Dominican Republic               | 6.2 (4.2 to 8.5)   | 11.1 (3.5 to 20.9) | 9.8 (1.7 to 19.9)  |
| Ecuador                          | 4.4 (2.9 to 6.2)   | 8.0 (2.5 to 15.1)  | 7.1 (1.2 to 14.6)  |
| Egypt                            | 5.0 (3.3 to 7.0)   | 9.0 (2.7 to 17.0)  | 8.0 (1.5 to 16.5)  |
| Eritrea                          | 3.7 (2.5 to 4.9)   | 6.7 (2.1 to 12.5)  | 5.9 (1.1 to 11.9)  |
| Estonia                          | 5.2 (3.4 to 7.1)   | 9.3 (2.8 to 17.5)  | 8.2 (1.3 to 16.9)  |
| Ethiopia                         | 2.5 (1.7 to 3.3)   | 4.6 (1.4 to 8.4)   | 4.0 (0.6 to 8.1)   |
| Fiji                             | 2.9 (1.8 to 4.1)   | 5.3 (1.6 to 10.0)  | 4.7 (0.8 to 9.8)   |
| Finland                          | 2.7 (1.8 to 3.8)   | 5.0 (1.5 to 9.4)   | 4.4 (0.8 to 9.1)   |
| France                           | 4.7 (3.2 to 6.5)   | 8.6 (2.6 to 16.0)  | 7.6 (1.3 to 15.7)  |
| French Polynesia                 | 3.0 (1.8 to 4.3)   | 5.4 (1.7 to 10.3)  | 4.8 (0.8 to 9.9)   |
| Gabon                            | 4.1 (2.6 to 5.9)   | 7.5 (2.2 to 14.3)  | 6.6 (1.1 to 13.8)  |
| Gambia                           | 3.5 (2.3 to 4.8)   | 6.3 (1.9 to 11.9)  | 5.6 (0.9 to 11.6)  |
| Georgia                          | 3.0 (1.9 to 4.3)   | 5.5 (1.7 to 10.4)  | 4.8 (0.7 to 10.1)  |
| Germany                          | 6.7 (4.6 to 9.1)   | 11.9 (3.6 to 22.2) | 10.6 (1.8 to 21.4) |
| Ghana                            | 3.6 (2.4 to 4.9)   | 6.5 (2.0 to 12.1)  | 5.8 (1.0 to 11.8)  |
| Greece                           | 6.0 (4.1 to 8.1)   | 10.8 (3.4 to 20.0) | 9.6 (2.0 to 19.6)  |
| Grenada                          | 4.7 (3.0 to 6.5)   | 8.4 (2.4 to 16.0)  | 7.4 (1.2 to 15.4)  |
| Guatemala                        | 5.9 (3.9 to 8.3)   | 10.6 (3.2 to 20.1) | 9.4 (1.6 to 19.4)  |
| Guinea                           | 2.4 (1.6 to 3.4)   | 4.4 (1.3 to 8.4)   | 3.9 (0.7 to 8.1)   |
| Hungary                          | 6.1 (4.1 to 8.3)   | 11.0 (3.3 to 20.4) | 9.7 (1.8 to 20.3)  |
| India                            | 5.5 (3.3 to 8.0)   | 9.8 (2.7 to 19.0)  | 8.7 (1.5 to 18.5)  |
| Indonesia                        | 3.7 (2.3 to 5.3)   | 6.7 (2.1 to 13.0)  | 6.0 (1.0 to 12.5)  |
| Iran (Islamic Republic of)       | 5.3 (3.6 to 7.4)   | 9.6 (2.8 to 18.2)  | 8.5 (1.5 to 17.4)  |
| Iraq                             | 8.1 (5.6 to 10.9)  | 14.3 (4.3 to 26.5) | 12.7 (2.4 to 25.9) |
| Ireland                          | 5.3 (3.6 to 7.2)   | 9.5 (2.9 to 17.6)  | 8.4 (1.5 to 17.2)  |
| Italy                            | 6.6 (4.5 to 8.9)   | 11.7 (3.5 to 21.9) | 10.4 (1.9 to 21.1) |
| Jamaica                          | 5.3 (3.5 to 7.2)   | 9.5 (3.0 to 17.8)  | 8.4 (1.3 to 17.5)  |
| Japan                            | 5.7 (3.2 to 8.8)   | 10.2 (2.8 to 20.8) | 9.0 (1.4 to 19.8)  |
| Jordan                           | 2.0 (1.2 to 2.8)   | 3.7 (1.1 to 7.0)   | 3.2 (0.5 to 6.7)   |
| Kazakhstan                       | 4.5 (2.9 to 6.5)   | 8.1 (2.4 to 15.4)  | 7.2 (1.4 to 14.8)  |
| Kenya                            | 2.6 (1.8 to 3.4)   | 4.7 (1.4 to 8.6)   | 4.1 (0.7 to 8.3)   |
| Kiribati                         | 6.4 (4.2 to 8.9)   | 11.5 (3.4 to 21.4) | 10.2 (1.8 to 21.0) |
| Kuwait                           | 10.2 (7.1 to 13.5) | 17.7 (5.4 to 32.8) | 15.8 (3.1 to 32.4) |
| Kyrgyzstan                       | 2.31 (1.4 to 3.5)  | 4.3 (1.2 to 8.4)   | 3.8 (0.6 to 8.1)   |
| Lao People's Democratic Republic | 2.7 (1.8 to 3.7)   | 5.0 (1.5 to 9.3)   | 4.4 (0.8 to 8.9)   |
| Latvia                           | 4.8 (3.2 to 6.7)   | 8.6 (2.6 to 16.1)  | 7.6 (1.3 to 15.7)  |
| Lebanon                          | 5.8 (3.9 to 8.0)   | 10.4 (3.2 to 19.6) | 9.3 (1.7 to 19.0)  |
| Lesotho                          | 1.1 (0.7 to 1.5)   | 2.0 (0.6 to 3.8)   | 1.7 (0.3 to 3.7)   |



|                                  |                  |                    |                    |
|----------------------------------|------------------|--------------------|--------------------|
| Liberia                          | 4.1 (2.7 to 5.7) | 7.4 (2.2 to 13.9)  | 6.6 (1.2 to 13.5)  |
| Libya                            | 5.8 (3.8 to 8.1) | 10.4 (3.3 to 19.6) | 9.3 (1.6 to 19.0)  |
| Lithuania                        | 4.3 (2.8 to 6.0) | 7.8 (2.4 to 14.7)  | 6.9 (1.2 to 14.1)  |
| Luxembourg                       | 4.6 (3.1 to 6.4) | 8.3 (2.6 to 15.6)  | 7.4 (1.3 to 14.9)  |
| Madagascar                       | 2.8 (1.9 to 4.0) | 5.2 (1.6 to 9.8)   | 4.6 (0.8 to 9.6)   |
| Malawi                           | 2.6 (1.8 to 3.5) | 4.8 (1.5 to 8.9)   | 4.2 (0.7 to 8.5)   |
| Malaysia                         | 6.2 (4.1 to 8.6) | 11.0 (3.3 to 21.0) | 9.8 (1.8 to 20.3)  |
| Maldives                         | 4.9 (3.1 to 6.9) | 8.8 (2.6 to 17.1)  | 7.8 (1.2 to 16.2)  |
| Mali                             | 6.4 (4.4 to 8.6) | 11.5 (3.6 to 21.1) | 10.2 (1.8 to 20.8) |
| Malta                            | 6.6 (4.5 to 9.0) | 11.8 (3.5 to 22.0) | 10.5 (1.6 to 21.1) |
| Marshall Islands                 | 6.9 (4.6 to 9.5) | 12.2 (3.6 to 23.2) | 10.9 (2.0 to 22.6) |
| Mauritania                       | 6.6 (4.5 to 8.9) | 11.7 (3.7 to 21.8) | 10.4 (1.9 to 20.8) |
| Mauritius                        | 4.8 (3.2 to 6.7) | 8.7 (2.6 to 16.6)  | 7.7 (1.3 to 15.9)  |
| Mexico                           | 4.7 (3.1 to 6.4) | 8.5 (2.5 to 15.9)  | 7.5 (1.4 to 15.3)  |
| Micronesia (Federated States of) | 5.9 (3.9 to 8.2) | 10.5 (3.1 to 20.0) | 9.3 (1.7 to 19.3)  |
| Mongolia                         | 3.1 (2.0 to 4.3) | 5.6 (1.7 to 10.7)  | 5.0 (0.9 to 10.2)  |
| Morocco                          | 4.3 (2.7 to 6.1) | 7.7 (2.3 to 15.2)  | 6.8 (1.2 to 14.4)  |
| Mozambique                       | 0.9 (0.6 to 1.3) | 1.8 (0.5 to 3.4)   | 1.5 (0.3 to 3.2)   |
| Myanmar                          | 1.8 (1.1 to 2.6) | 3.3 (1.0 to 6.3)   | 2.9 (0.5 to 6.1)   |
| Namibia                          | 5.4 (3.6 to 7.4) | 9.7 (3.0 to 17.9)  | 8.6 (1.4 to 17.4)  |
| Nauru                            | 6.7 (4.4 to 9.3) | 11.9 (3.6 to 22.7) | 10.5 (1.8 to 21.8) |
| Nepal                            | 2.2 (1.5 to 3.0) | 4.1 (1.2 to 7.6)   | 3.6 (0.7 to 7.3)   |
| Netherlands                      | 4.4 (3.0 to 6.1) | 8.0 (2.3 to 15.1)  | 7.1 (1.2 to 14.6)  |
| New Zealand                      | 6.7 (4.6 to 9.0) | 12.0 (3.6 to 22.3) | 10.6 (1.9 to 21.8) |
| Niger                            | 3.7 (2.4 to 5.2) | 6.7 (2.0 to 12.9)  | 5.9 (0.9 to 12.4)  |
| Nigeria                          | 4.4 (2.9 to 6.0) | 8.0 (2.4 to 15.0)  | 7.1 (1.3 to 14.6)  |
| Niue                             | 1.2 (0.7 to 1.7) | 2.2 (0.6 to 4.2)   | 1.9 (0.3 to 3.9)   |
| Norway                           | 5.1 (3.4 to 7.0) | 9.2 (2.7 to 17.5)  | 8.2 (1.4 to 16.7)  |
| Oman                             | 5.3 (3.5 to 7.4) | 9.5 (2.9 to 18.1)  | 8.4 (1.4 to 17.3)  |
| Pakistan                         | 5.4 (3.2 to 8.0) | 9.7 (2.8 to 19.1)  | 8.6 (1.4 to 18.5)  |
| Palau                            | 6.5 (4.3 to 9.0) | 11.6 (3.5 to 22.0) | 10.3 (1.9 to 21.1) |
| Papua New Guinea                 | 2.5 (1.4 to 3.7) | 4.5 (1.3 to 8.8)   | 4.0 (0.7 to 8.6)   |
| Paraguay                         | 6.0 (4.0 to 8.2) | 10.7 (3.2 to 20.3) | 9.5 (1.6 to 19.7)  |
| Philippines                      | 6.3 (4.2 to 8.6) | 11.3 (3.4 to 21.2) | 10.0 (1.8 to 20.4) |
| Poland                           | 5.2 (3.5 to 7.2) | 9.4 (2.9 to 17.9)  | 8.3 (1.4 to 17.1)  |
| Portugal                         | 6.9 (4.7 to 9.4) | 12.2 (3.8 to 22.9) | 10.8 (1.8 to 22.3) |
| Qatar                            | 5.9 (3.9 to 8.1) | 10.5 (3.1 to 19.9) | 9.3 (1.6 to 19.4)  |
| Republic of Korea                | 5.7 (3.1 to 8.6) | 10.2 (2.8 to 20.2) | 9.0 (1.4 to 19.6)  |
| Republic of Moldova              | 1.9 (1.2 to 2.8) | 3.6 (1.0 to 6.8)   | 3.1 (0.5 to 6.6)   |
| Romania                          | 5.7 (3.8 to 7.8) | 10.2 (3.0 to 18.9) | 9.0 (1.5 to 18.5)  |
| Russian Federation               | 2.8 (1.8 to 4.0) | 5.2 (1.5 to 9.9)   | 4.6 (0.9 to 9.4)   |
| Rwanda                           | 2.4 (1.6 to 3.4) | 4.5 (1.3 to 8.5)   | 3.9 (0.6 to 8.1)   |
| Saint Kitts & Nevis              | 5.2 (3.4 to 7.2) | 9.3 (2.9 to 18.0)  | 8.3 (1.5 to 17.2)  |

|                                    |                   |                    |                    |
|------------------------------------|-------------------|--------------------|--------------------|
| Saint Lucia                        | 6.3 (4.2 to 8.8)  | 11.3 (3.5 to 21.5) | 10.0 (1.7 to 20.6) |
| Samoa                              | 2.1 (1.3 to 3.1)  | 3.9 (1.1 to 7.5)   | 3.4 (0.5 to 7.1)   |
| Sao Tome & Principe                | 2.6 (1.7 to 3.6)  | 4.7 (1.4 to 8.9)   | 4.2 (0.8 to 8.5)   |
| Saudi Arabia                       | 8.3 (5.6 to 11.1) | 14.5 (4.5 to 27.2) | 12.9 (2.4 to 26.5) |
| Senegal                            | 3.8 (2.6 to 5.2)  | 6.9 (2.2 to 12.8)  | 6.1 (1.0 to 12.4)  |
| Serbia                             | 6.3 (4.2 to 8.7)  | 11.2 (3.5 to 21.0) | 10.0 (1.6 to 20.4) |
| Seychelles                         | 3.1 (2.0 to 4.4)  | 5.7 (1.7 to 11.0)  | 5.0 (0.9 to 10.4)  |
| Sierra Leone                       | 2.4 (1.6 to 3.3)  | 4.4 (1.3 to 8.3)   | 3.9 (0.7 to 8.0)   |
| Singapore                          | 5.8 (3.2 to 8.8)  | 10.5 (2.9 to 20.8) | 9.3 (1.5 to 20.3)  |
| Slovakia                           | 5.6 (3.8 to 7.6)  | 10.1 (3.0 to 18.8) | 8.9 (1.5 to 18.3)  |
| Slovenia                           | 5.2 (3.5 to 7.2)  | 9.3 (2.9 to 17.5)  | 8.3 (1.4 to 17.1)  |
| Solomon Islands                    | 3.0 (1.9 to 4.3)  | 5.5 (1.6 to 10.5)  | 4.9 (0.9 to 10.0)  |
| South Africa                       | 6.1 (4.1 to 8.4)  | 10.9 (3.2 to 20.6) | 9.7 (1.7 to 19.8)  |
| Spain                              | 4.2 (3.0 to 6.0)  | 7.9 (2.4 to 14.7)  | 7.0 (1.2 to 14.4)  |
| Sri Lanka                          | 4.7 (3.0 to 6.6)  | 8.5 (2.5 to 16.1)  | 7.5 (1.2 to 15.5)  |
| State of Palestine                 | 6.4 (4.3 to 8.8)  | 11.5 (3.6 to 21.4) | 10.2 (1.9 to 20.9) |
| Suriname                           | 7.0 (4.8 to 9.5)  | 12.4 (3.7 to 23.3) | 11.1 (2.0 to 22.4) |
| Swaziland                          | 4.5 (3.1 to 6.1)  | 8.2 (2.5 to 15.2)  | 7.3 (1.4 to 14.7)  |
| Sweden                             | 3.8 (2.5 to 5.2)  | 6.9 (2.1 to 13.0)  | 6.1 (1.0 to 12.4)  |
| Switzerland                        | 3.9 (2.6 to 5.4)  | 7.1 (2.1 to 13.6)  | 6.2 (1.0 to 12.9)  |
| Tajikistan                         | 4.7 (3.1 to 6.8)  | 8.6 (2.7 to 16.4)  | 7.6 (1.3 to 15.6)  |
| Thailand                           | 4.0 (2.6 to 5.7)  | 7.3 (2.2 to 13.9)  | 6.4 (1.0 to 13.2)  |
| Timor-Leste                        | 2.9 (1.8 to 4.3)  | 5.4 (1.6 to 10.5)  | 4.8 (0.9 to 9.9)   |
| Togo                               | 1.6 (1.1 to 2.3)  | 3.0 (0.9 to 5.7)   | 2.7 (0.5 to 5.6)   |
| Tokelau                            | 1.9 (1.1 to 2.7)  | 3.4 (1.0 to 6.7)   | 3.0 (0.5 to 6.4)   |
| Tonga                              | 2.9 (1.8 to 4.1)  | 5.3 (1.6 to 10.2)  | 4.7 (0.9 to 9.7)   |
| Trinidad and Tobago                | 6.1 (3.9 to 8.6)  | 10.9 (3.3 to 21.0) | 9.7 (1.9 to 19.9)  |
| Tunisia                            | 4.9 (3.2 to 6.8)  | 8.9 (2.8 to 16.9)  | 7.8 (1.3 to 16.2)  |
| Turkey                             | 4.9 (3.2 to 6.9)  | 8.9 (2.6 to 16.8)  | 7.9 (1.4 to 16.4)  |
| Tuvalu                             | 4.4 (3.0 to 6.2)  | 8.0 (2.5 to 15.2)  | 7.1 (1.3 to 14.6)  |
| Uganda                             | 0.9 (0.6 to 1.3)  | 1.7 (0.5 to 3.3)   | 1.5 (0.3 to 3.2)   |
| Ukraine                            | 3.2 (2.1 to 4.6)  | 5.9 (1.8 to 11.4)  | 5.2 (0.9 to 10.6)  |
| United Arab Emirates               | 6.6 (4.5 to 8.9)  | 11.7 (3.6 to 22.0) | 10.4 (1.8 to 21.5) |
| United Kingdom                     | 5.8 (3.9 to 7.8)  | 10.3 (3.1 to 19.3) | 9.1 (1.7 to 18.5)  |
| United Republic of Tanzania        | 1.1 (0.7 to 1.6)  | 2.0 (0.6 to 3.8)   | 1.8 (0.3 to 3.7)   |
| United States of America           | 6.4 (4.3 to 8.6)  | 11.4 (3.5 to 21.3) | 10.1 (1.6 to 20.6) |
| Uruguay                            | 3.7 (2.4 to 5.2)  | 6.7 (2.0 to 12.7)  | 5.9 (1.1 to 12.2)  |
| Uzbekistan                         | 3.1 (1.9 to 4.6)  | 5.8 (1.8 to 11.3)  | 5.1 (0.9 to 10.7)  |
| Vanuatu                            | 1.3 (0.8 to 2.0)  | 2.5 (0.7 to 4.9)   | 2.2 (0.4 to 4.7)   |
| Venezuela (Bolivarian Republic of) | 5.17 (3.3 to 7.1) | 9.1 (2.7 to 17.2)  | 8.1 (1.4 to 17.0)  |
| Viet Nam                           | 4.1 (2.7 to 5.8)  | 7.5 (2.2 to 14.3)  | 6.6 (1.2 to 13.6)  |
| Zambia                             | 3.6 (2.4 to 5.0)  | 6.6 (2.0 to 12.3)  | 5.8 (1.0 to 11.8)  |
| Zimbabwe                           | 4.4 (2.8 to 6.1)  | 7.9 (2.3 to 14.9)  | 7.0 (1.2 to 14.3)  |
